# Supplementary material for: Synthesis and Structural Confirmation of the Thiazole Alkaloids Derived from Peganum harmala L.
Source: MDPI journal article supplement (doi:10.3390/app12010078), 2021-12-22
Supplement: s1 [file s1]

## Supplementary Materials

# Synthesis and structural confirmation of the thiazole alkaloids derived from *Peganum harmala* L.

Myeonghyeon Sim<sup>1</sup>, Sujin Lee<sup>2,\*</sup> and Young Taek Han<sup>1,\*</sup>

<sup>1</sup>College of Pharmacy, Dankook University, Cheonan 31116, Korea;

<sup>2</sup>College of Pharmacy, Daegu Catholic University, Gyungsan 38430, Korea;

\*Correspondence: hanyt@dankook.ac.kr (Y. T. Han); Tel.: +82-41-550-1431; sujinlee@cu.ac.kr (S. Lee)

## Content

|                                                                                  |    |
|----------------------------------------------------------------------------------|----|
| Table S1. <sup>1</sup> H- and <sup>13</sup> C-NMR assignment of peganumal B----- | S2 |
| Table S2. <sup>1</sup> H- and <sup>13</sup> C-NMR assignment of peganumal A----- | S3 |
| <sup>1</sup> H NMR and <sup>13</sup> C NMR Spectra -----                         | S4 |

Table S1. <sup>1</sup>H- and <sup>13</sup>C-NMR assignment of Peganum B.

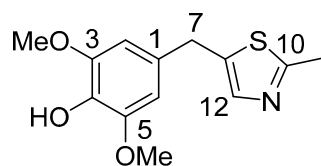

| Position           | Reported                           |            | Synthesized                        |            |
|--------------------|------------------------------------|------------|------------------------------------|------------|
|                    | $\delta_H$ (multi, <i>J</i> in Hz) | $\delta_C$ | $\delta_H$ (multi, <i>J</i> in Hz) | $\delta_C$ |
| 1                  |                                    | 130.1      |                                    | 130.1      |
| 2                  | 6.50(s)                            | 105.8      | 6.51(s, 1H)                        | 105.9      |
| 3                  |                                    | 148.0      |                                    | 148.0      |
| 3-OCH <sub>3</sub> | 3.71(s, 3H)                        | 56.0       | 3.71(s, 3H)                        | 56.0       |
| 4                  |                                    | 134.1      |                                    | 134.2      |
| 4-OH               | 8.21(br s, 1H)                     |            | 8.18(br s, 1H)                     |            |
| 5                  |                                    | 148.0      |                                    | 148.0      |
| 5-OCH <sub>3</sub> | 3.71(s, 3H)                        | 56.0       | 3.71(s, 3H)                        | 56.0       |
| 6                  | 6.50(s, 1H)                        | 105.8      | 6.51(s, 1H)                        | 105.9      |
| 7                  | 3.98(s, 2H)                        | 32.3       | 3.98(s, 2H)                        | 32.3       |
| 8                  |                                    | 138.8      |                                    | 138.8      |
| 9                  |                                    |            |                                    | -          |
| 10                 |                                    | 164.1      |                                    | 164.1      |
| 10-CH <sub>3</sub> | 2.55(s, 3H)                        | 18.8       | 2.55(s, 3H)                        | 18.8       |
| 11                 |                                    |            |                                    | -          |
| 12                 | 7.38 (s, 1H)                       | 139.1      | 7.38 (s, 1H)                       | 139.1      |

<sup>1</sup>H NMR and <sup>13</sup>C spectra were recorded in DMSO at 500 MHz and 125 MHz, respectively.

Table S2. <sup>1</sup>H- and <sup>13</sup>C-NMR assignment of Peganum A

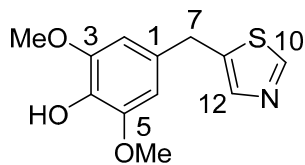

| Position           | Reported                           |            | Synthesized                        |            |
|--------------------|------------------------------------|------------|------------------------------------|------------|
|                    | $\delta_H$ (multi, <i>J</i> in Hz) | $\delta_C$ | $\delta_H$ (multi, <i>J</i> in Hz) | $\delta_C$ |
| 1                  |                                    | 130.0      |                                    | 130.0      |
| 2                  | 6.52 (s, 1H)                       | 105.9      | 6.52 (s, 1H)                       | 105.9      |
| 3                  |                                    | 148.0      |                                    | 148.0      |
| 3-OCH <sub>3</sub> | 3.71 (s, 3H)                       | 56.0       | 3.71 (s, 3H)                       | 56.0       |
| 4                  |                                    | 134.2      |                                    | 134.2      |
| 4-OH               | 8.22 (brs, 1H)                     |            | 8.21 (s, 1H)                       |            |
| 5                  |                                    | 148.0      |                                    | 148.0      |
| 5-OCH <sub>3</sub> | 3.71 (s, 3H)                       | 56.0       | 3.71 (s, 3H)                       | 56.0       |
| 6                  | 6.52 (s, 1H)                       | 105.9      | 6.52 (s, 1H)                       | 105.9      |
| 7                  | 4.08 (s, 2H)                       | 31.9       | 4.08 (s, 2H)                       | 31.9       |
| 8                  |                                    | 139.4      |                                    | 139.4      |
| 9                  |                                    |            |                                    |            |
| 10                 | 8.91 (d, 0.5Hz, 1H)                | 153.1      | 8.91 (d, 0.6Hz, 1H)                | 153.1      |
| 11                 |                                    |            |                                    |            |
| 12                 | 7.70 (d, 0.5Hz, 1H)                | 140.5      | 7.70 (d, 0.6Hz, 1H)                | 140.5      |

<sup>1</sup>H NMR and <sup>13</sup>C spectra were recorded in DMSO at 500 MHz and 125 MHz, respectively.

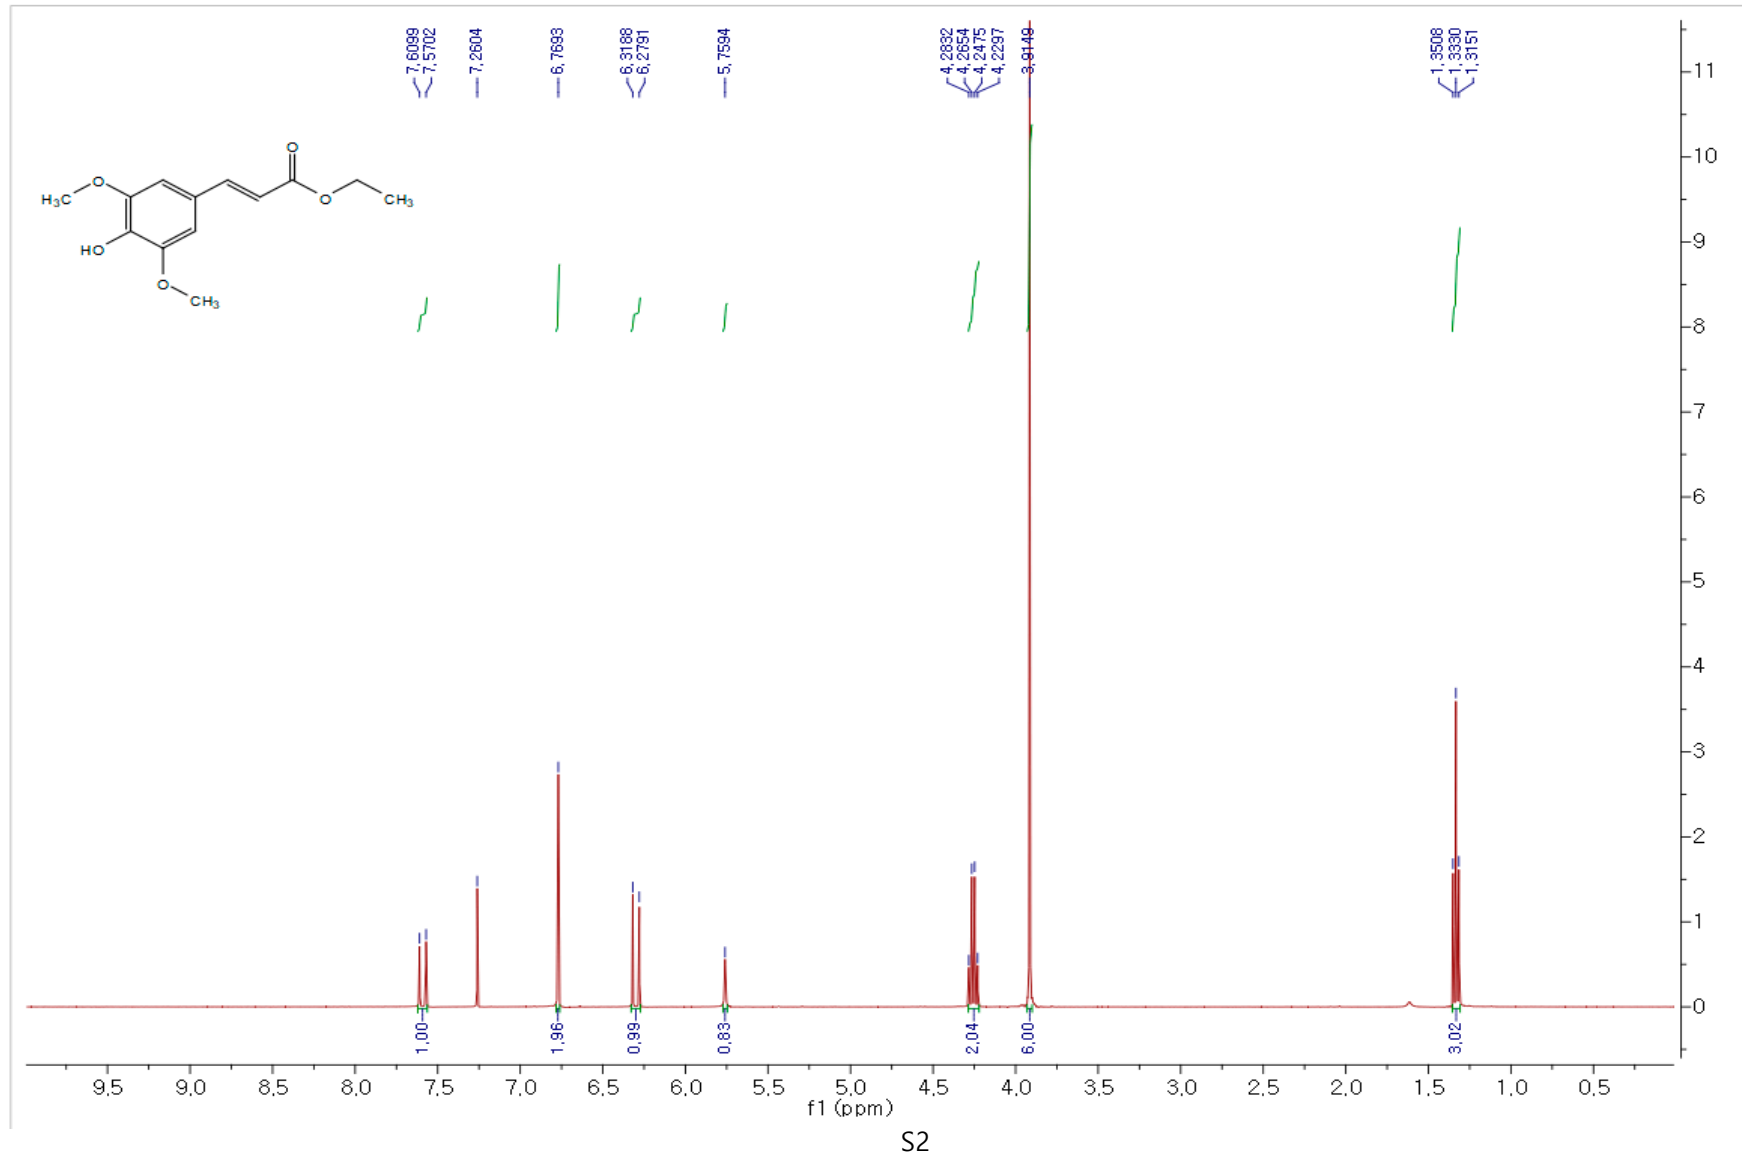

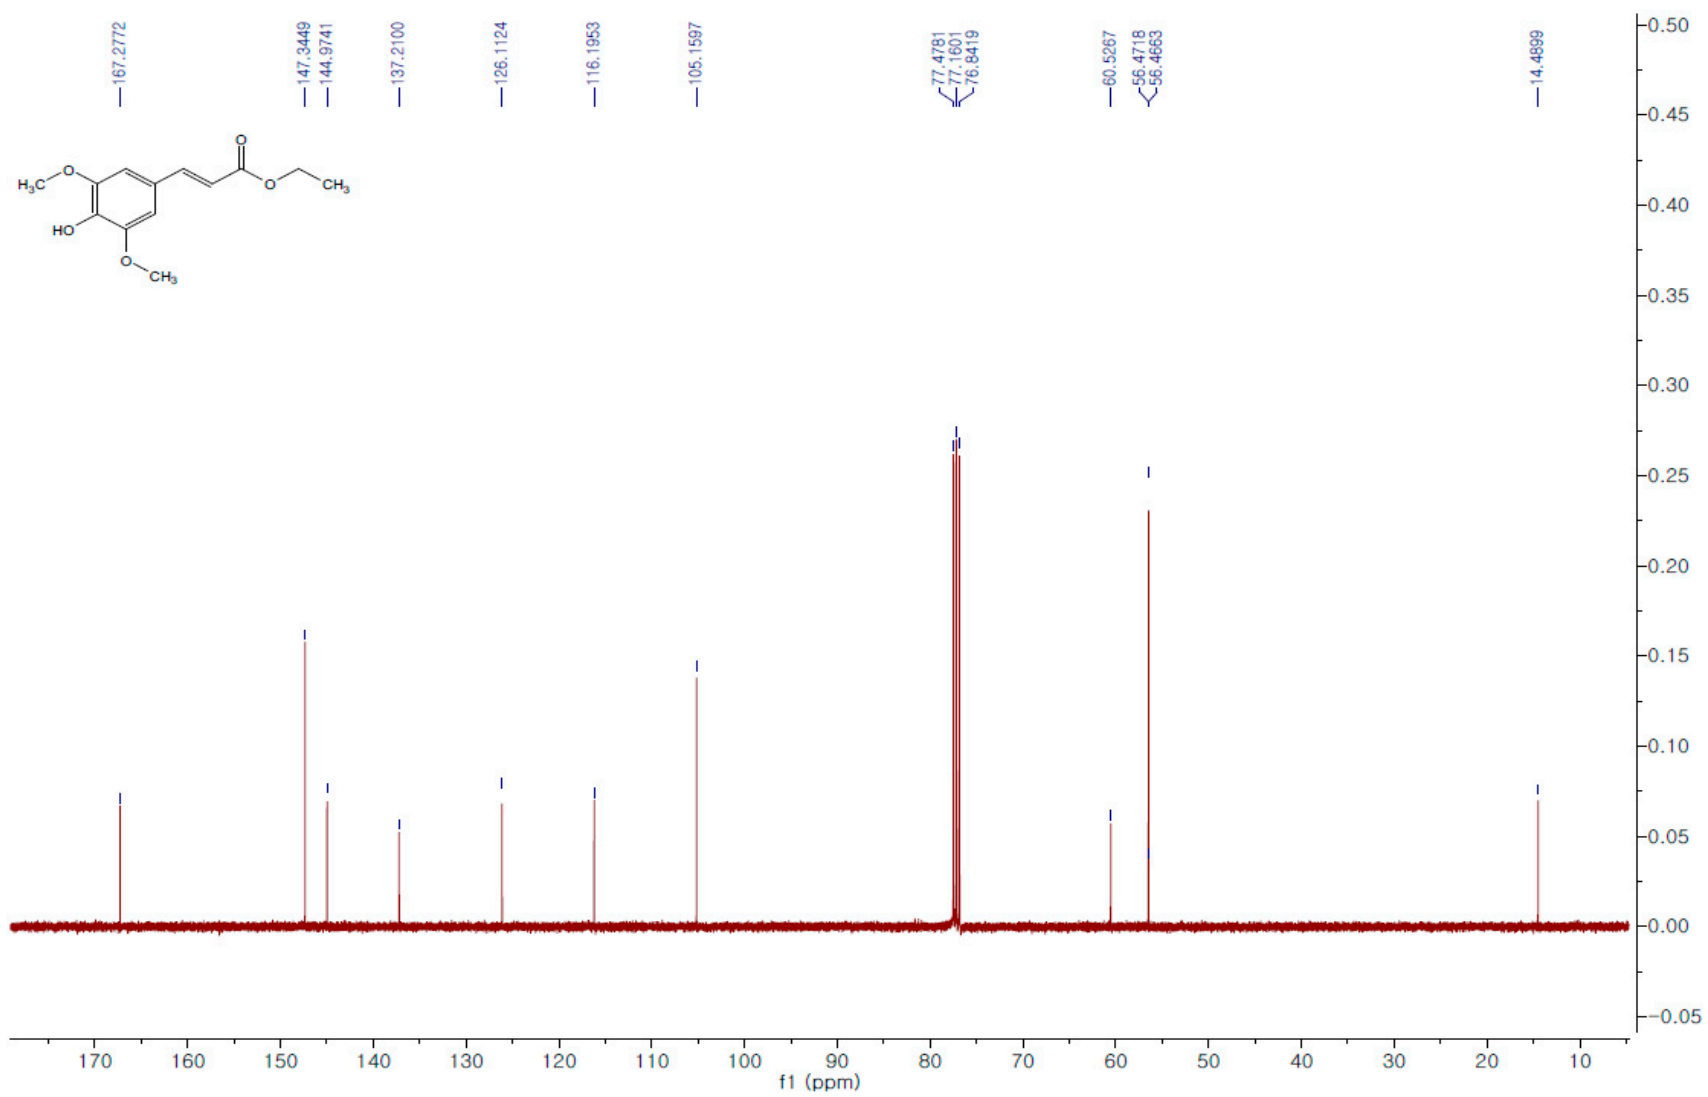

S3

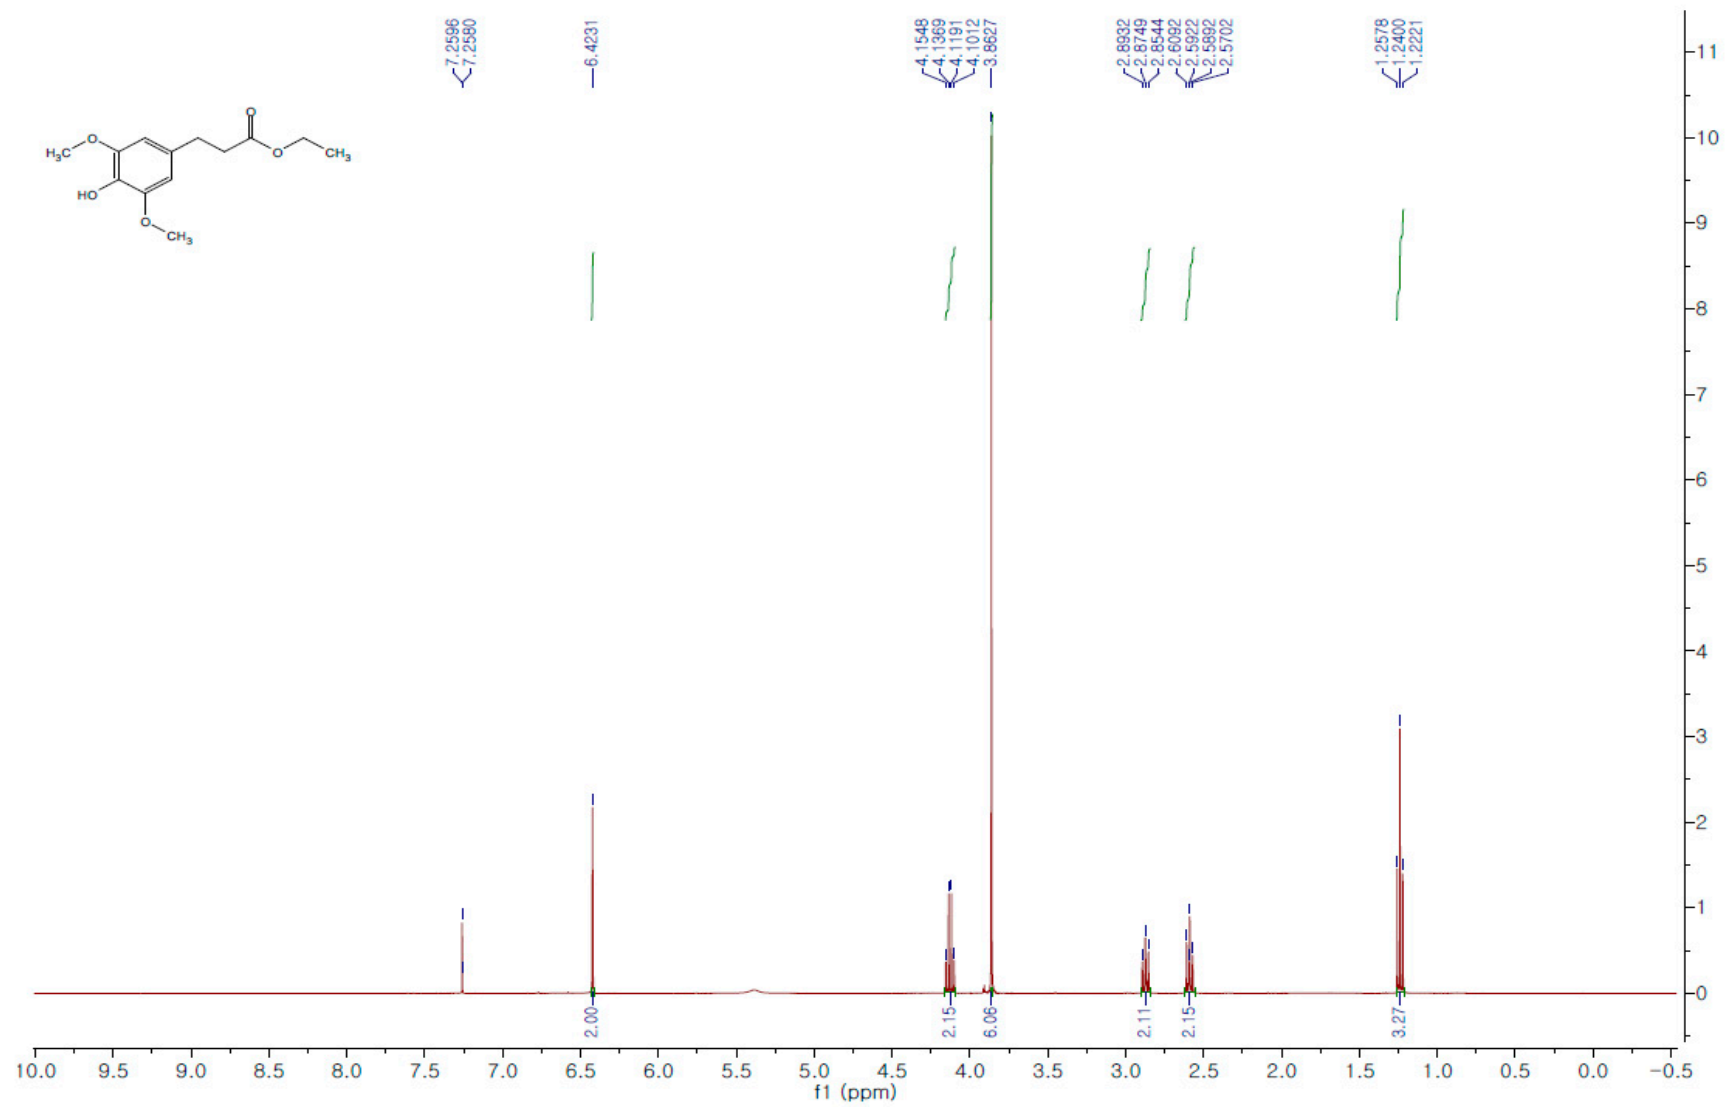

S4

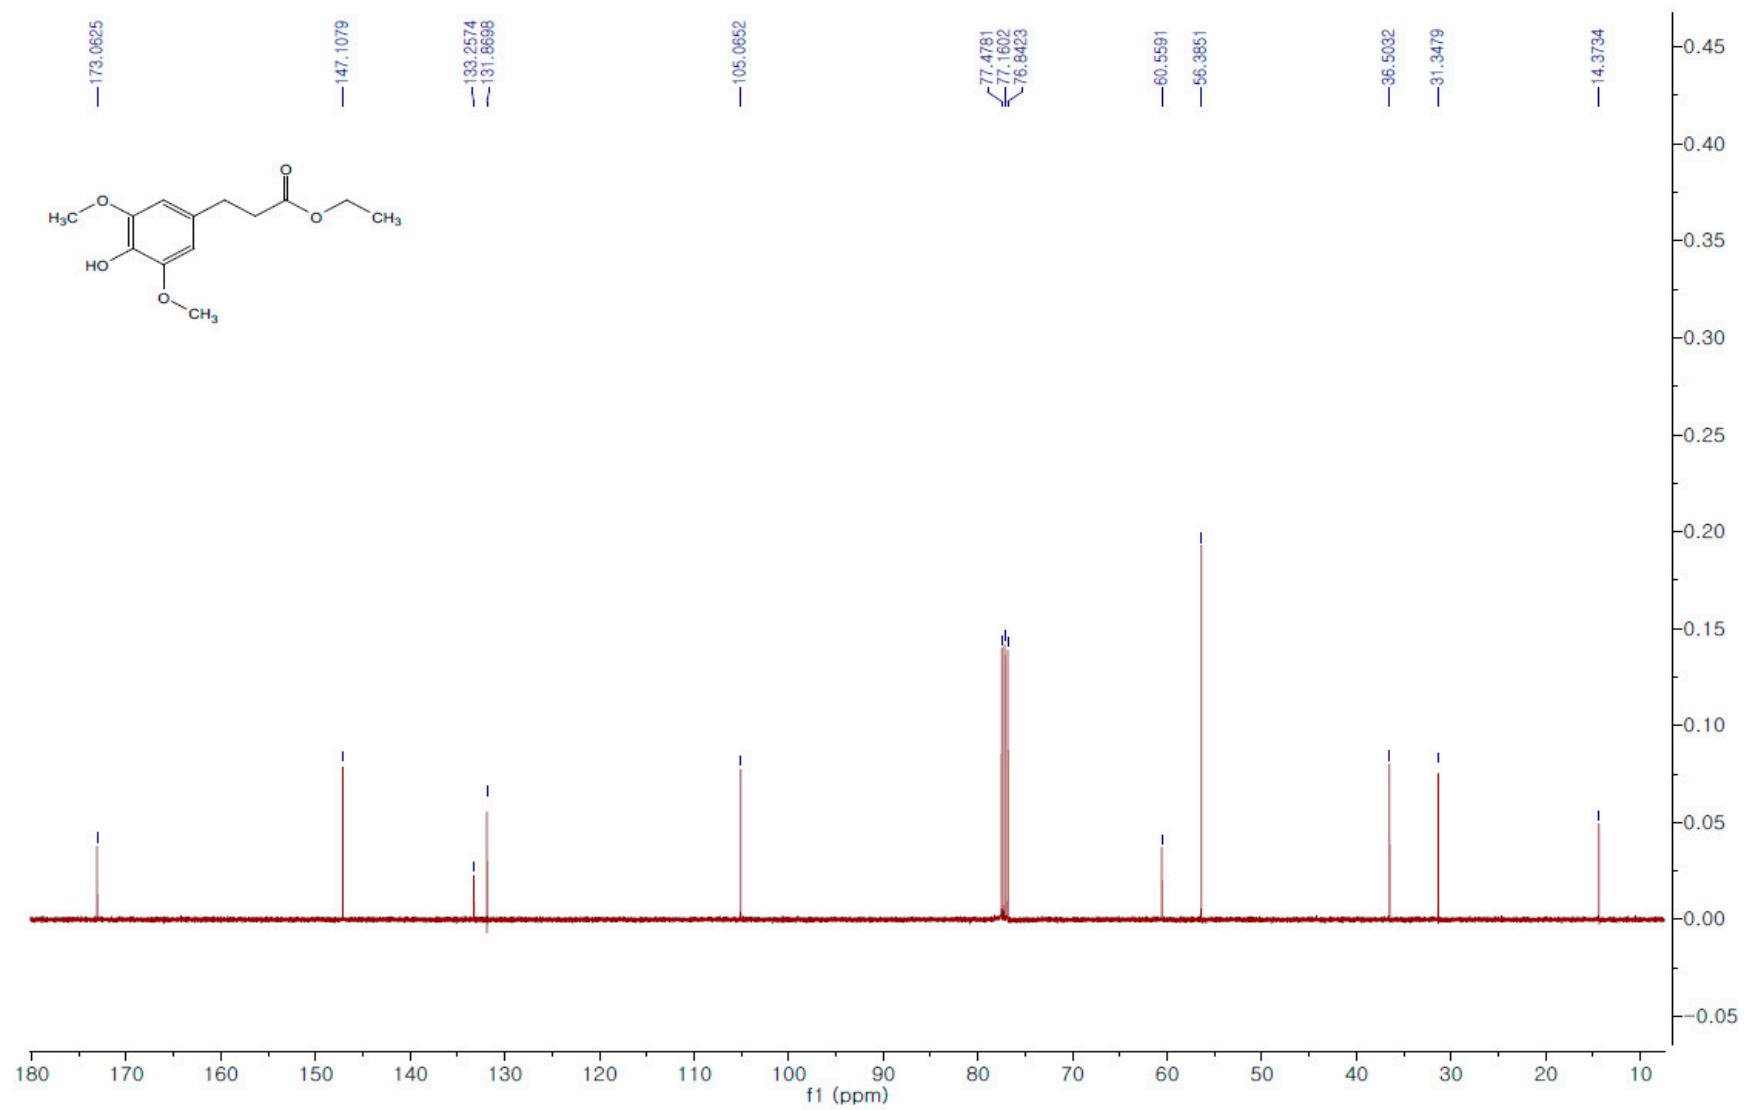

S5

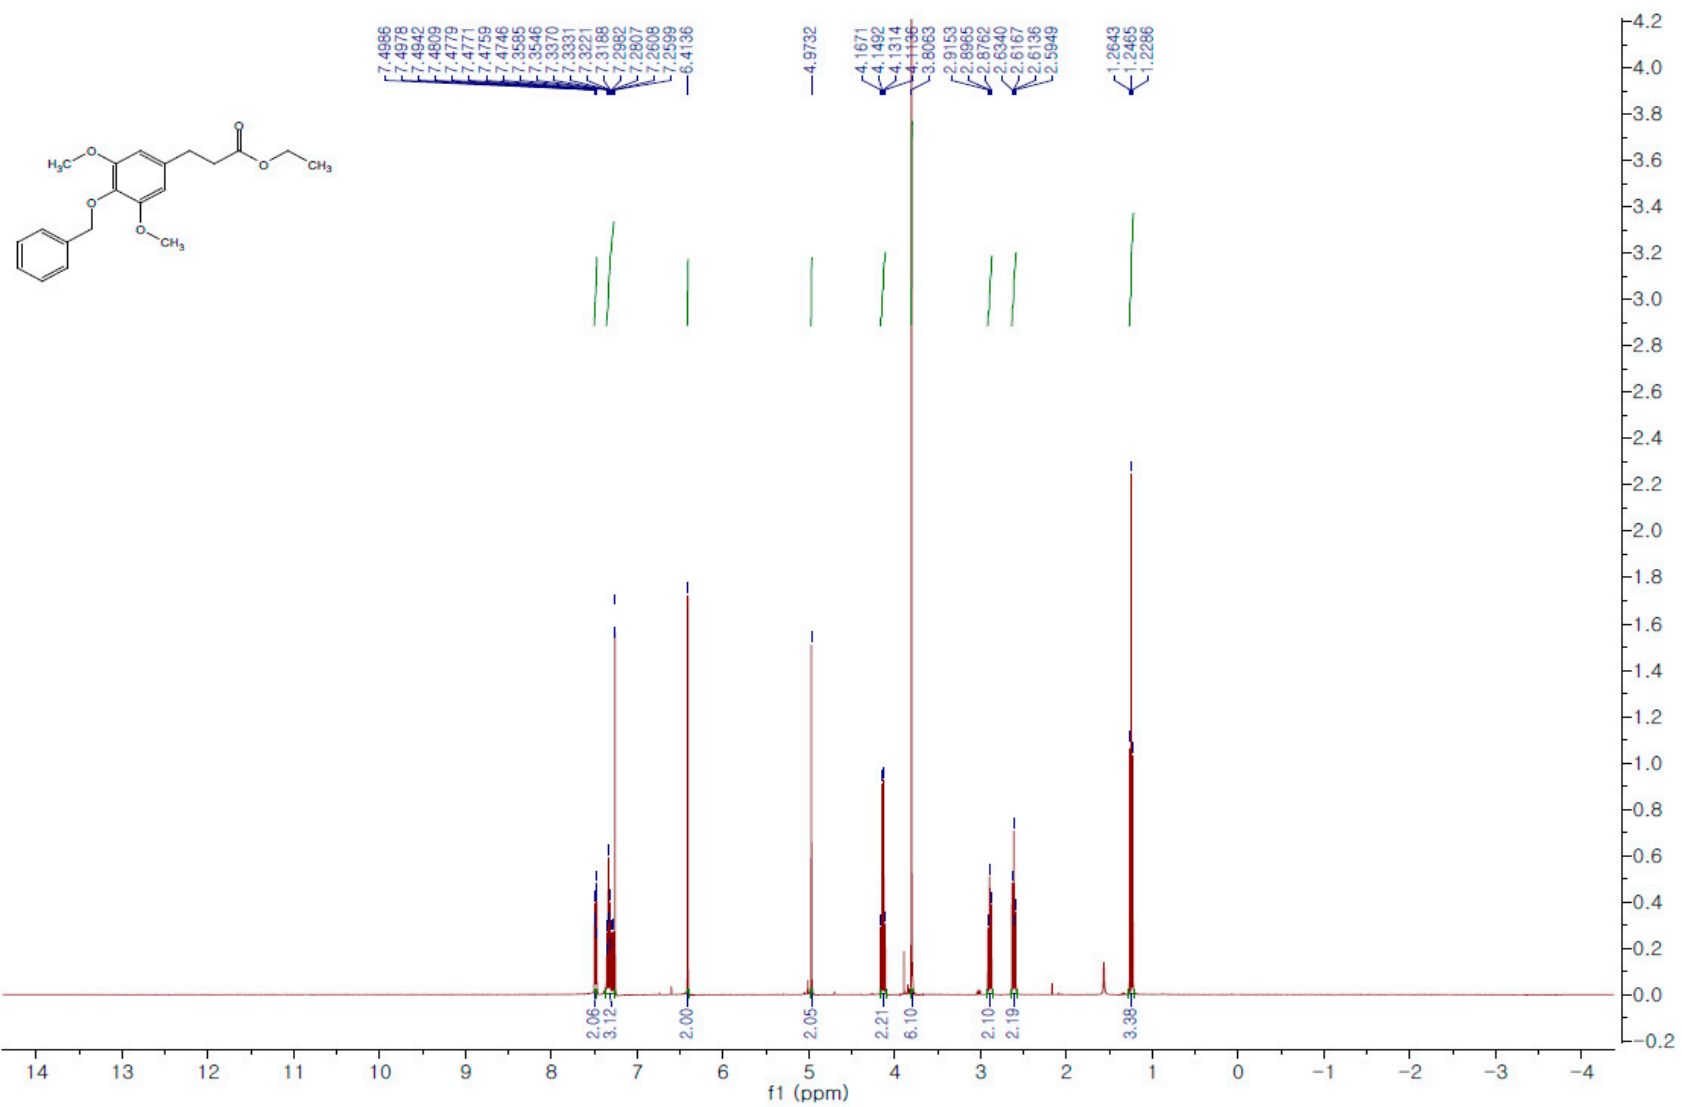



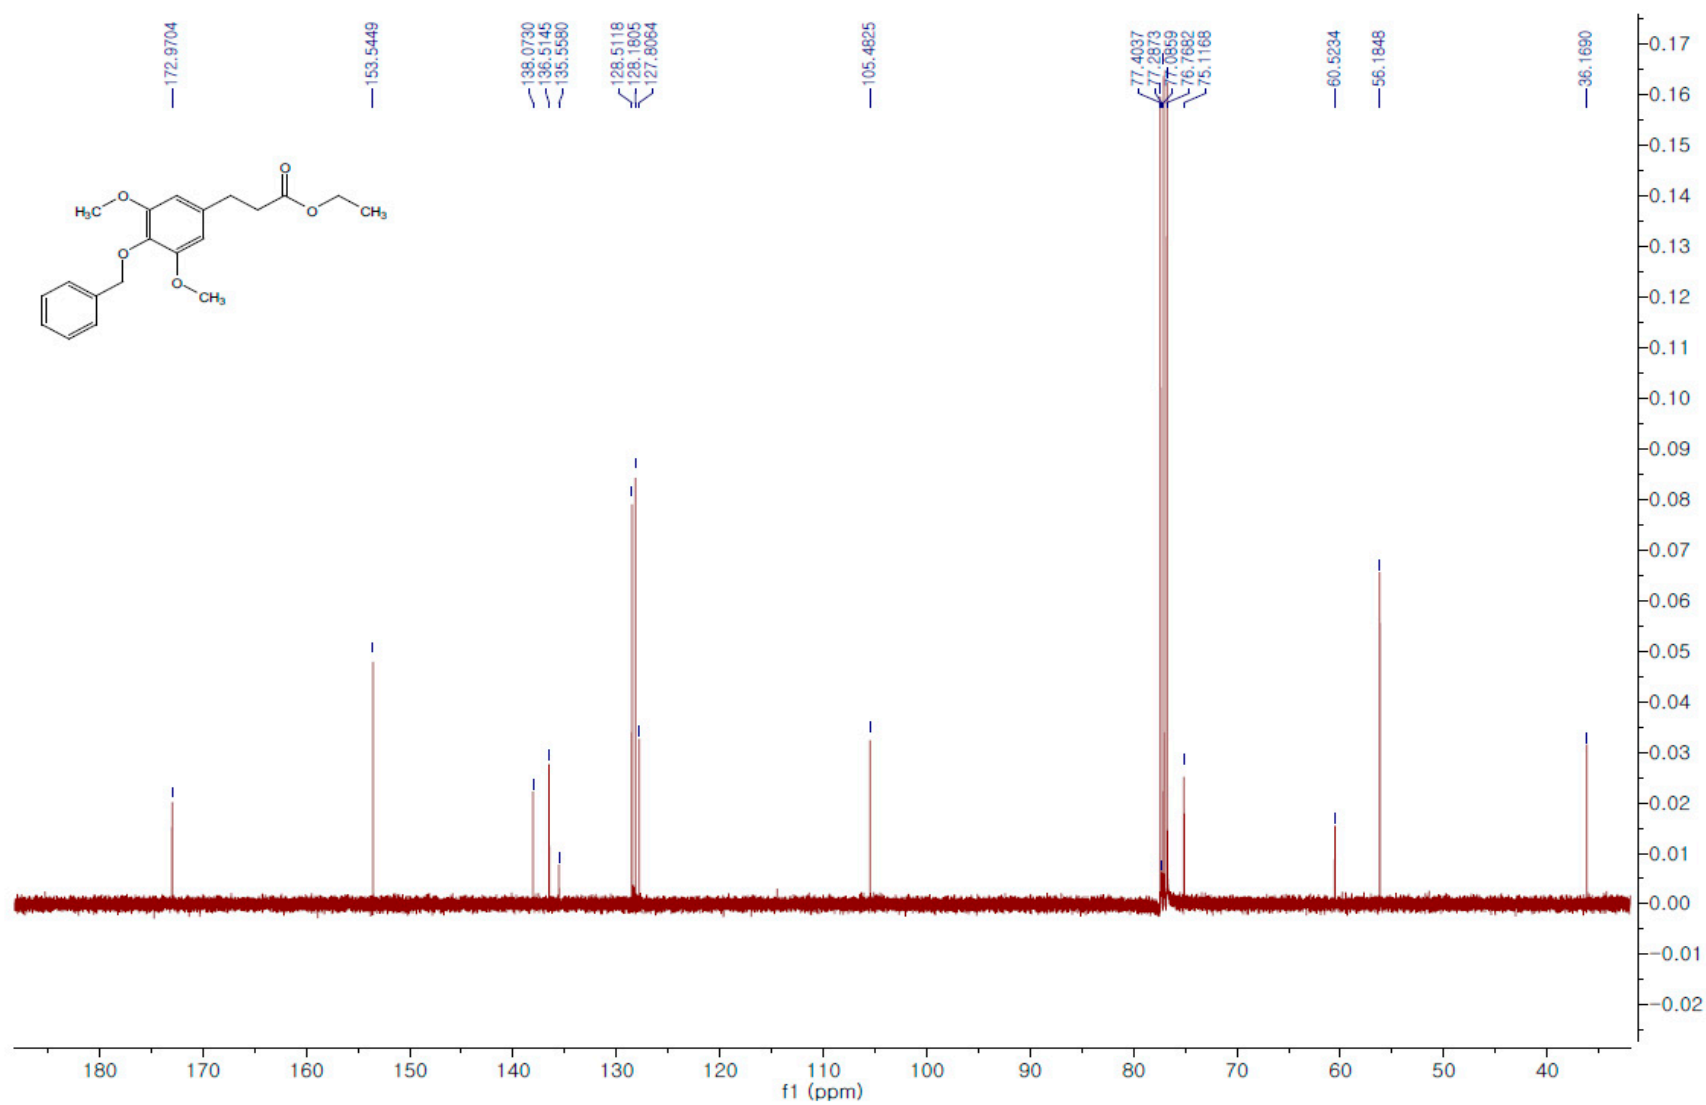

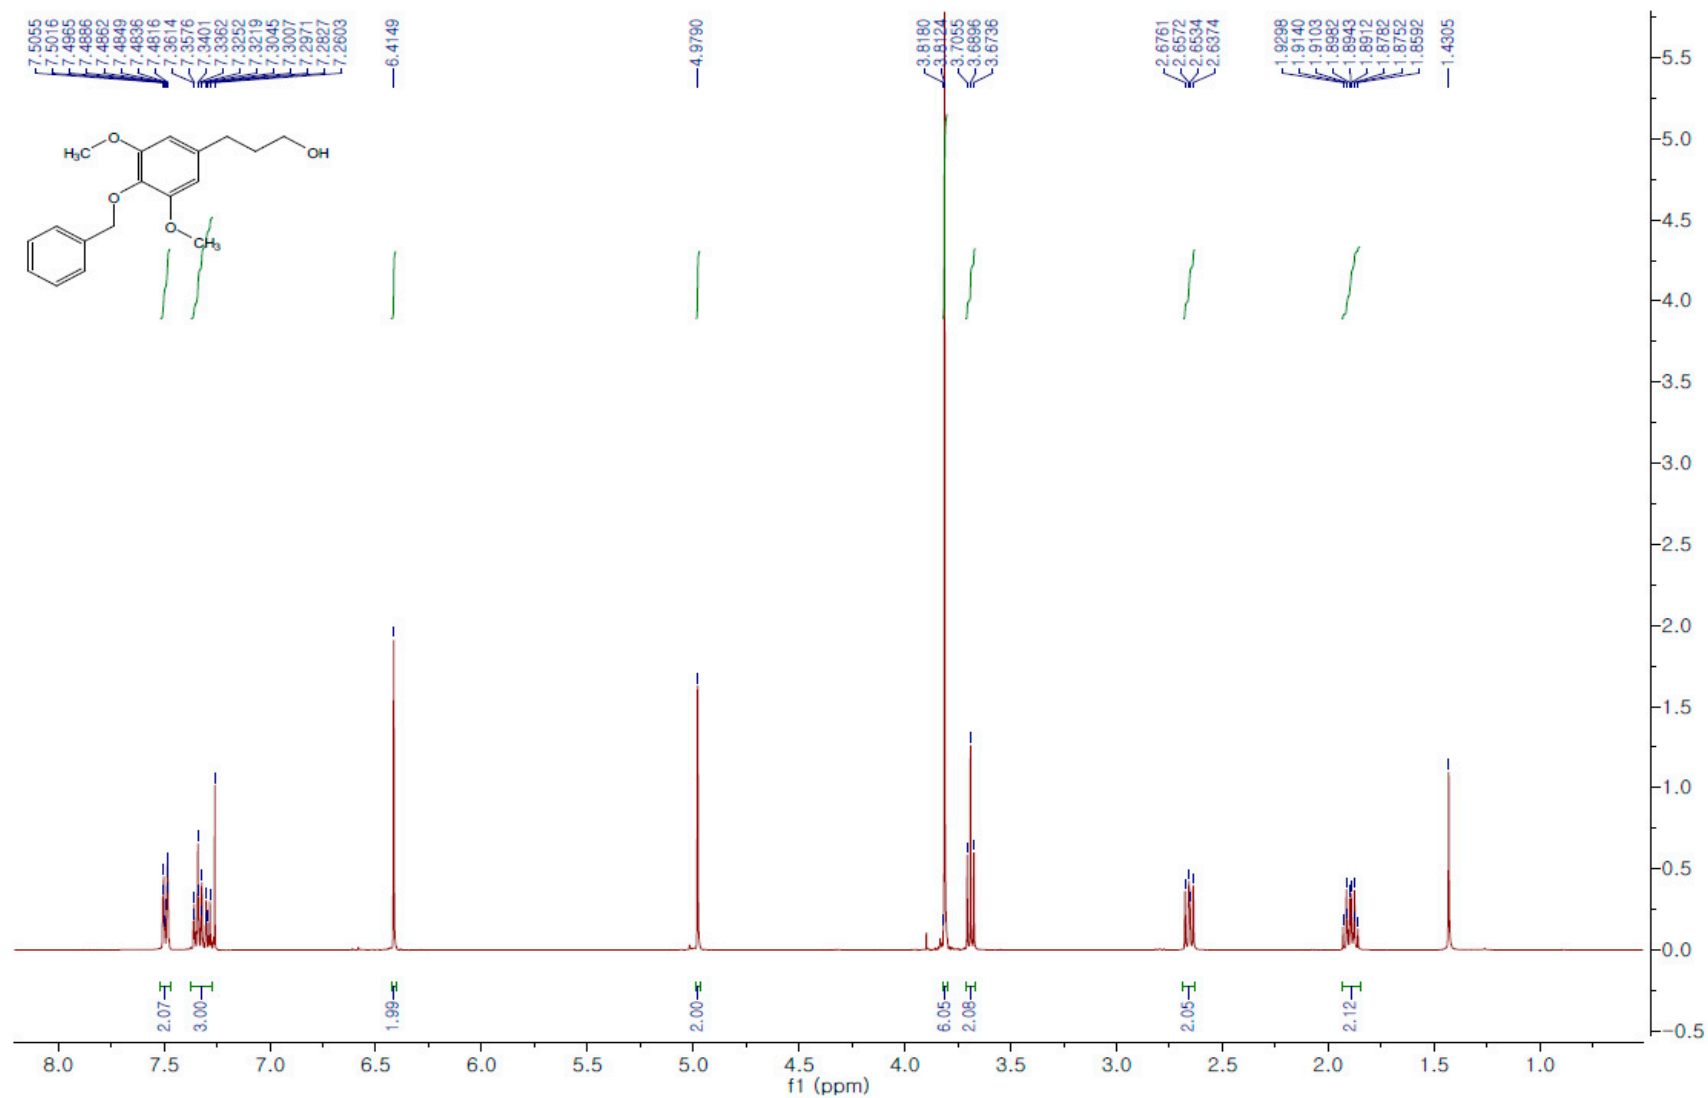

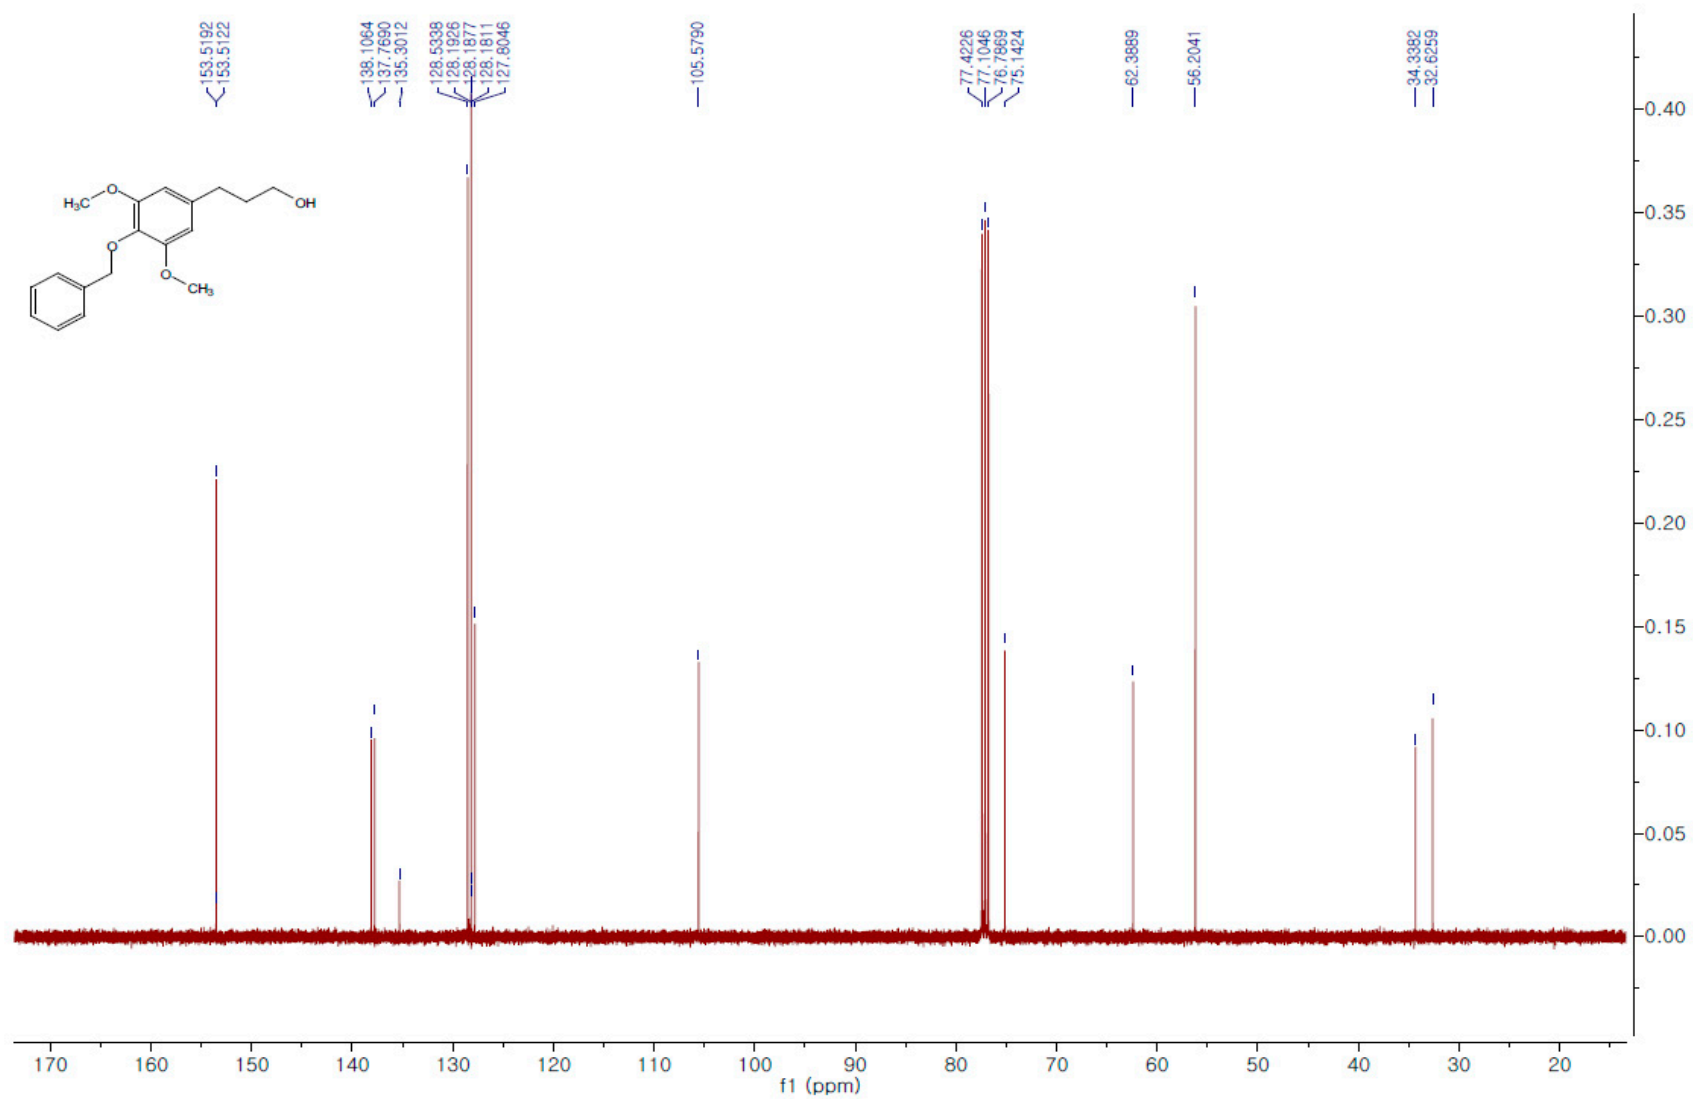

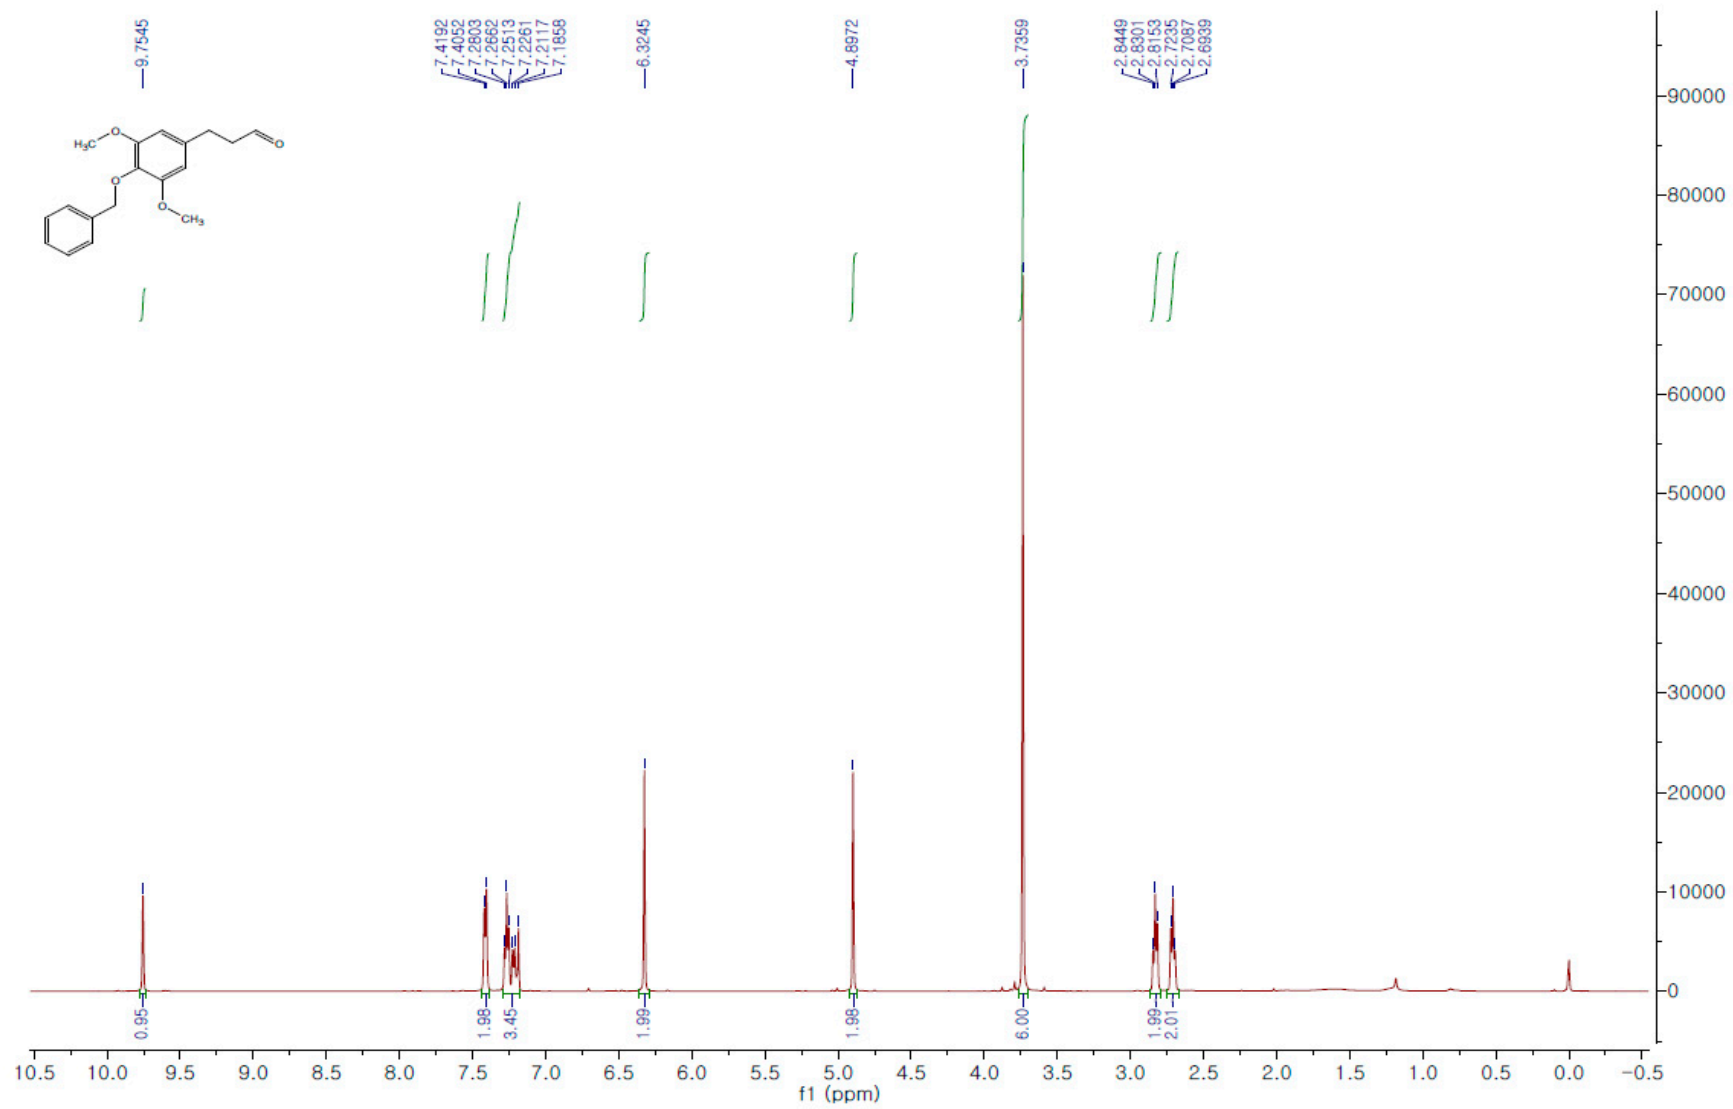

S10

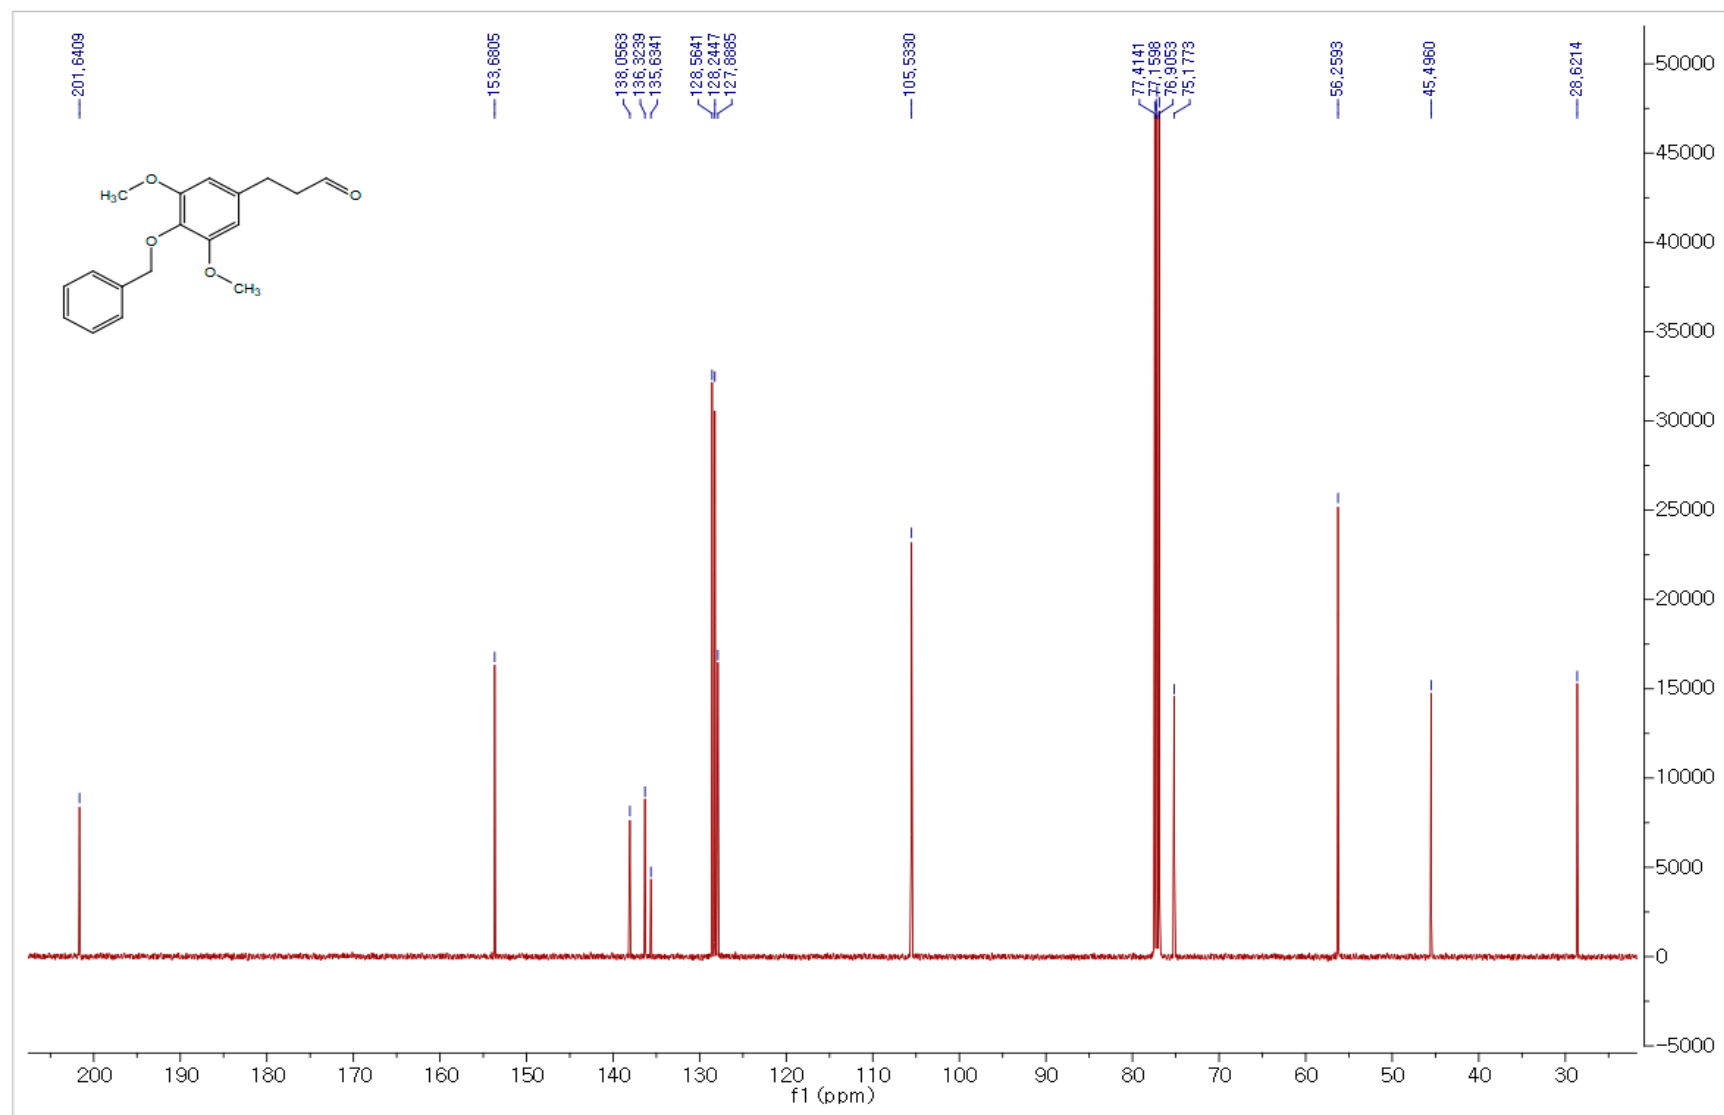

S11

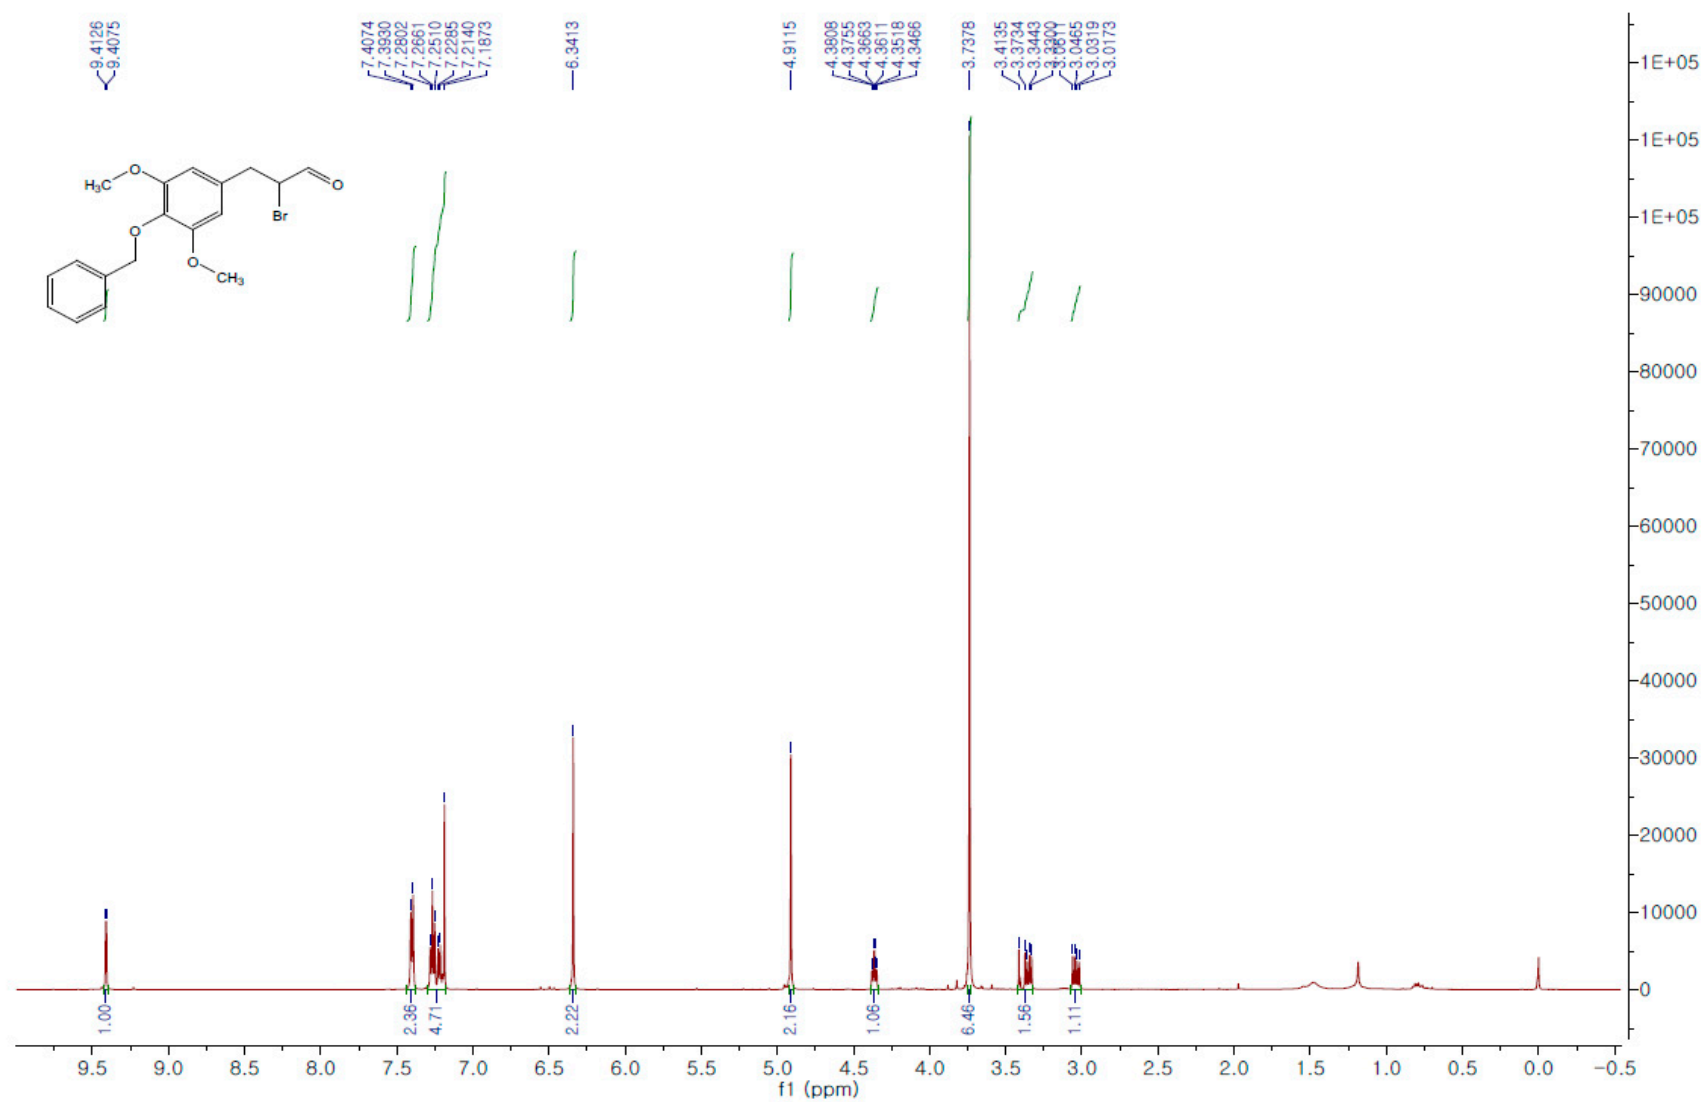

S12

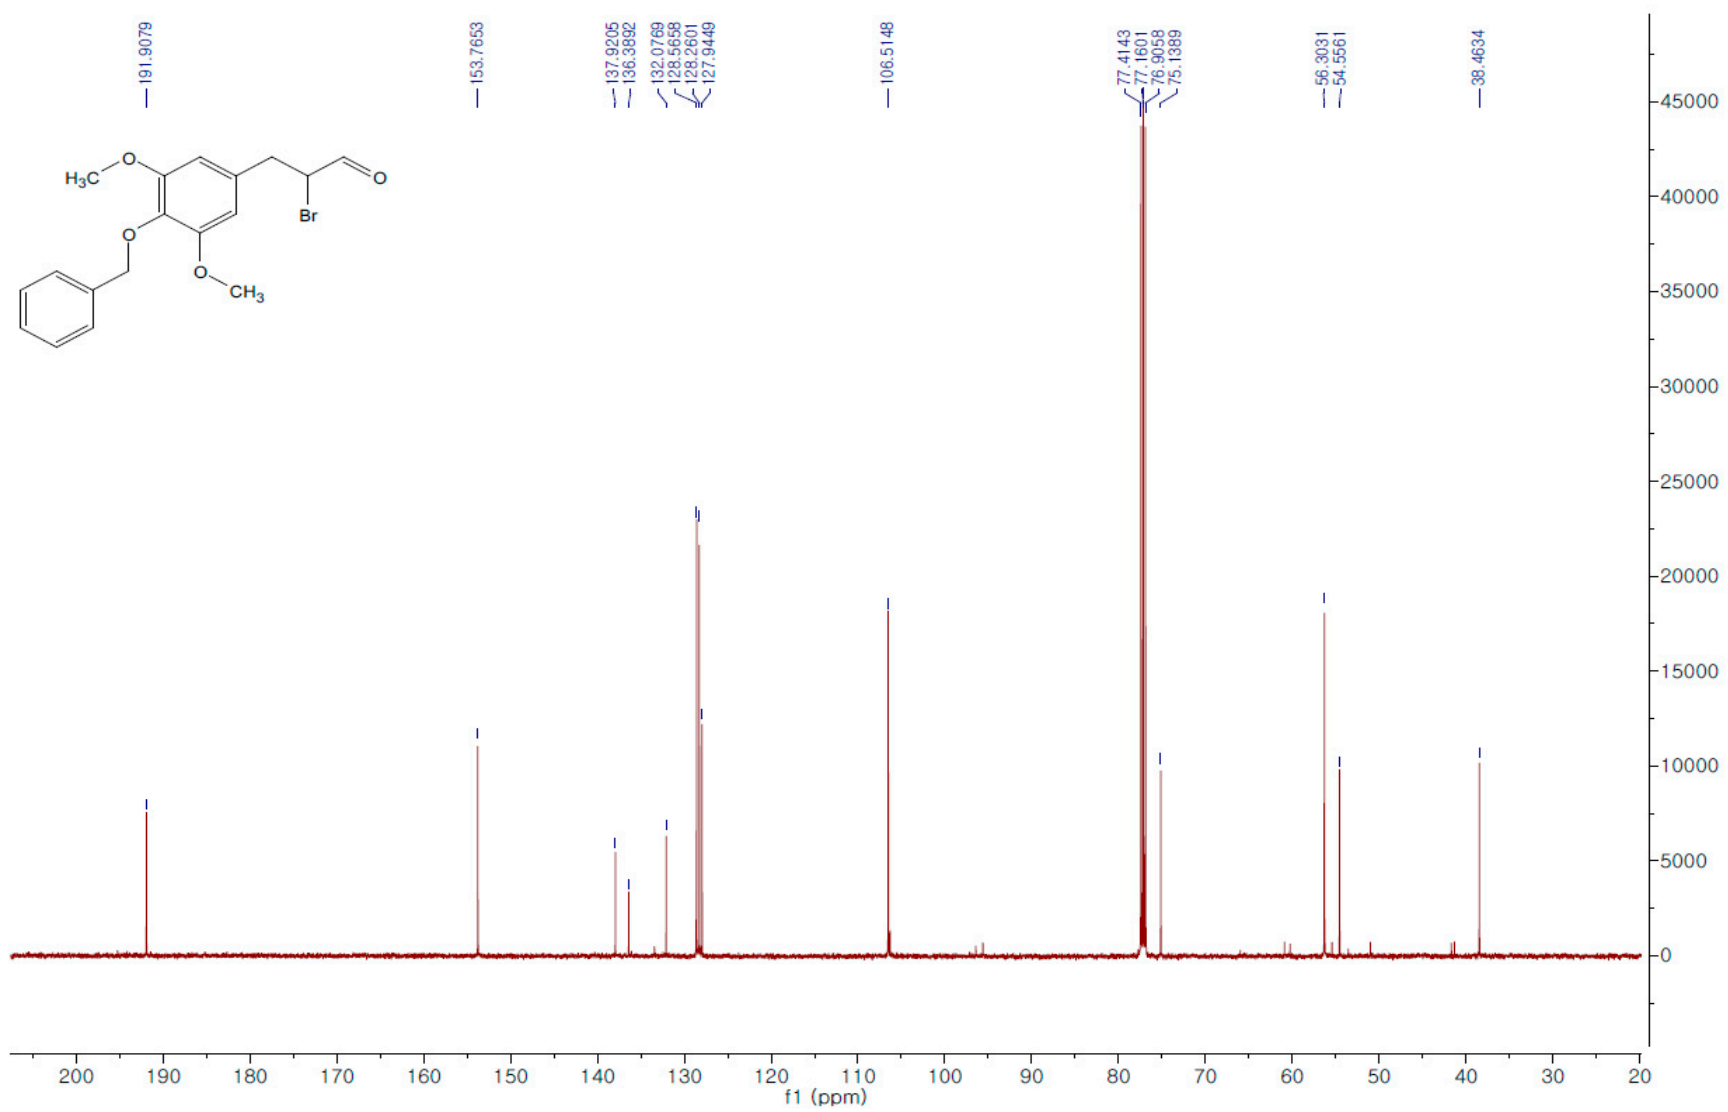

S13

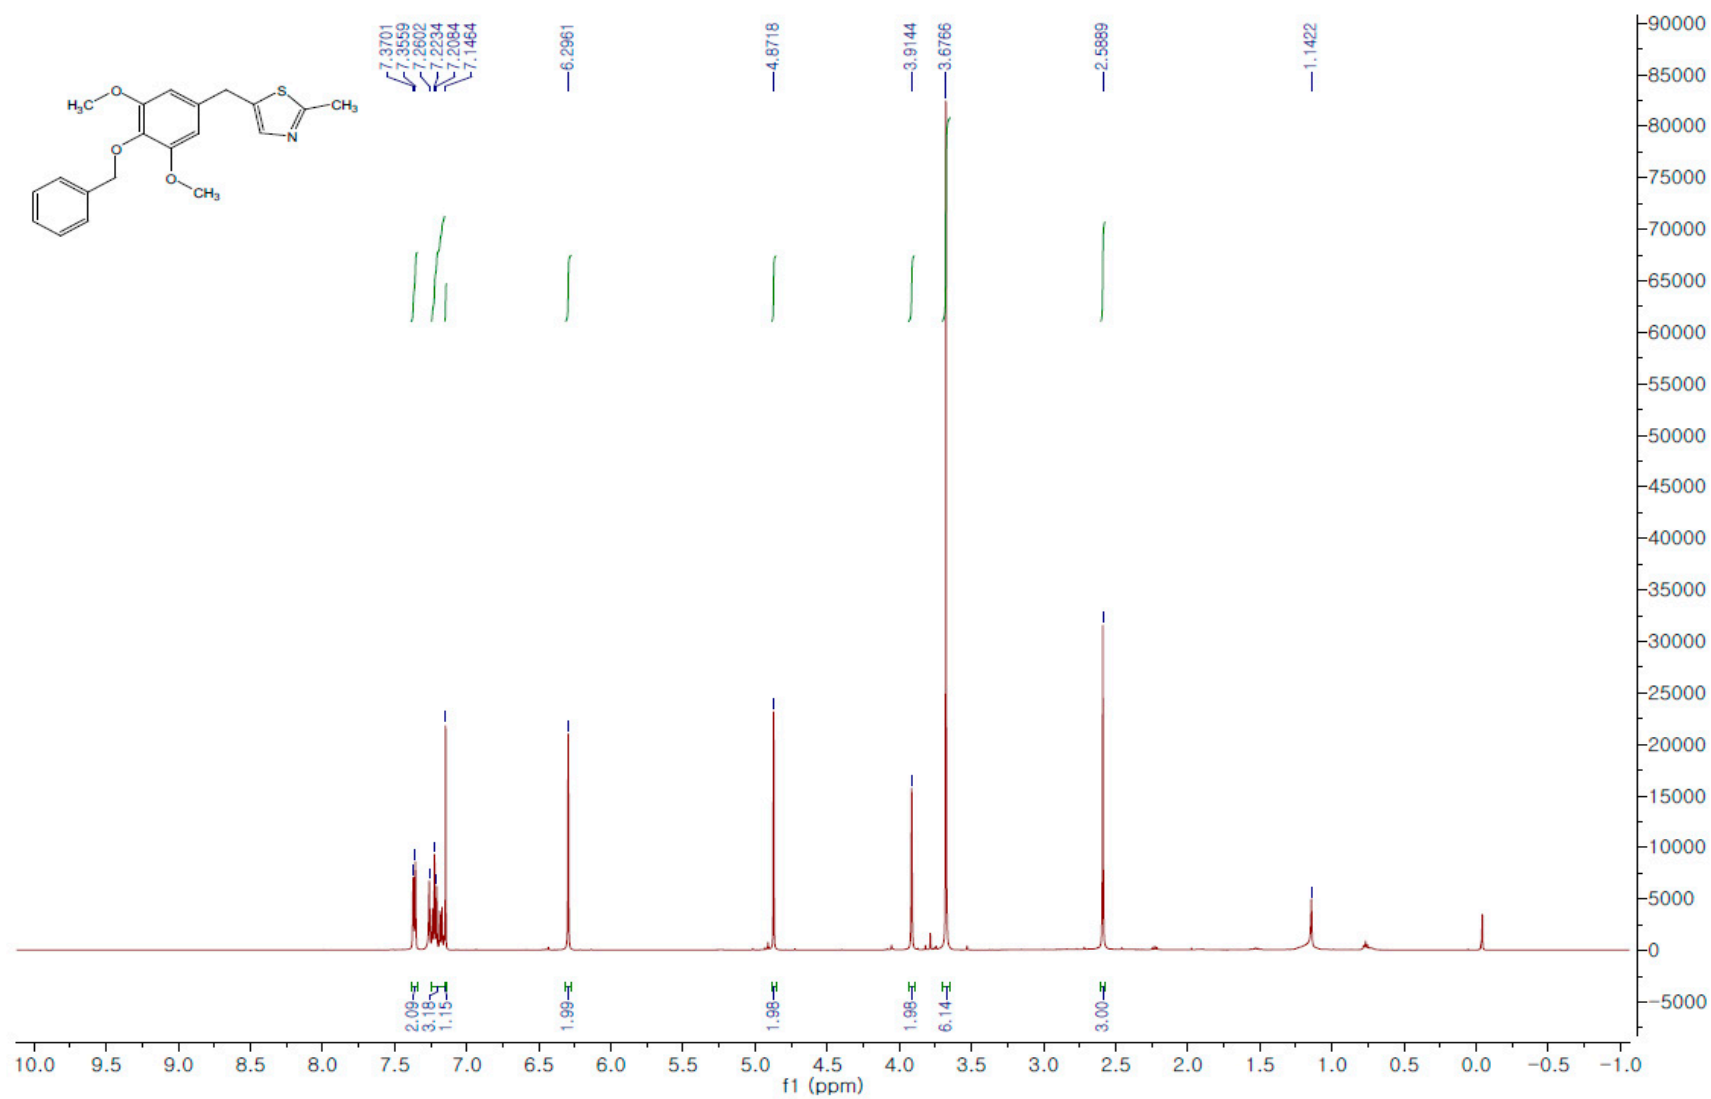

S14



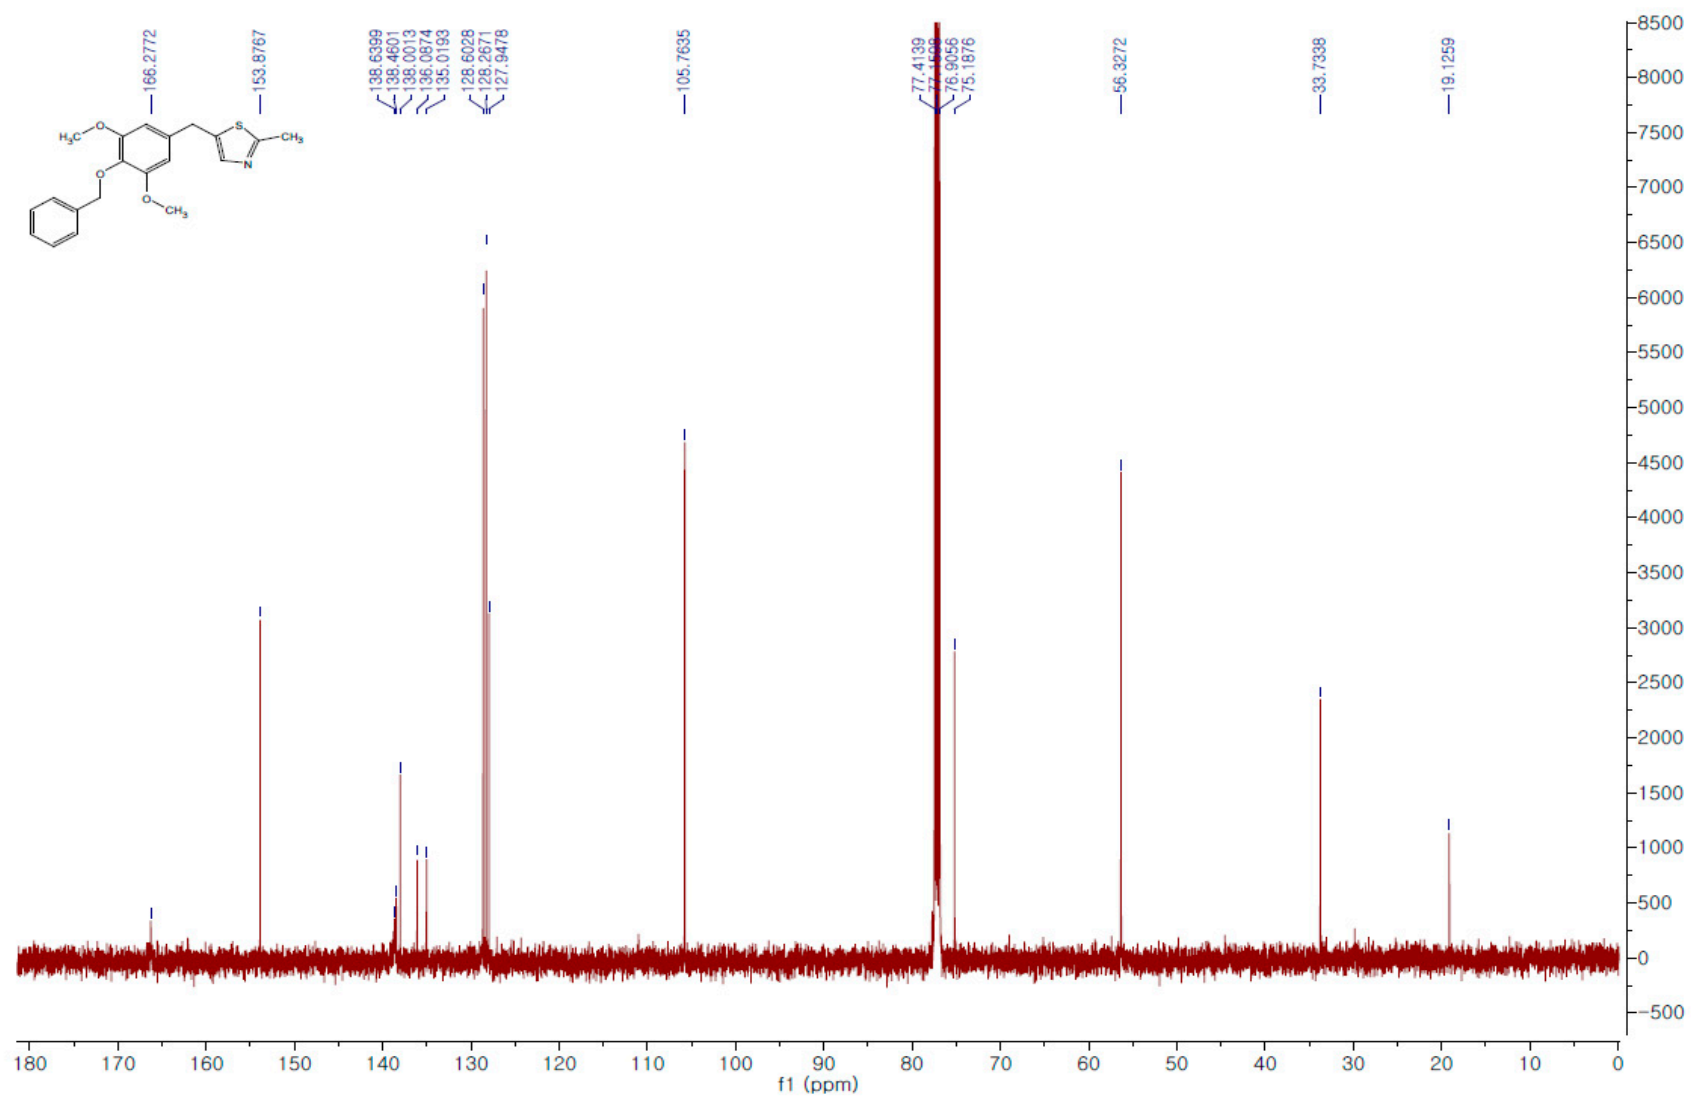

S15

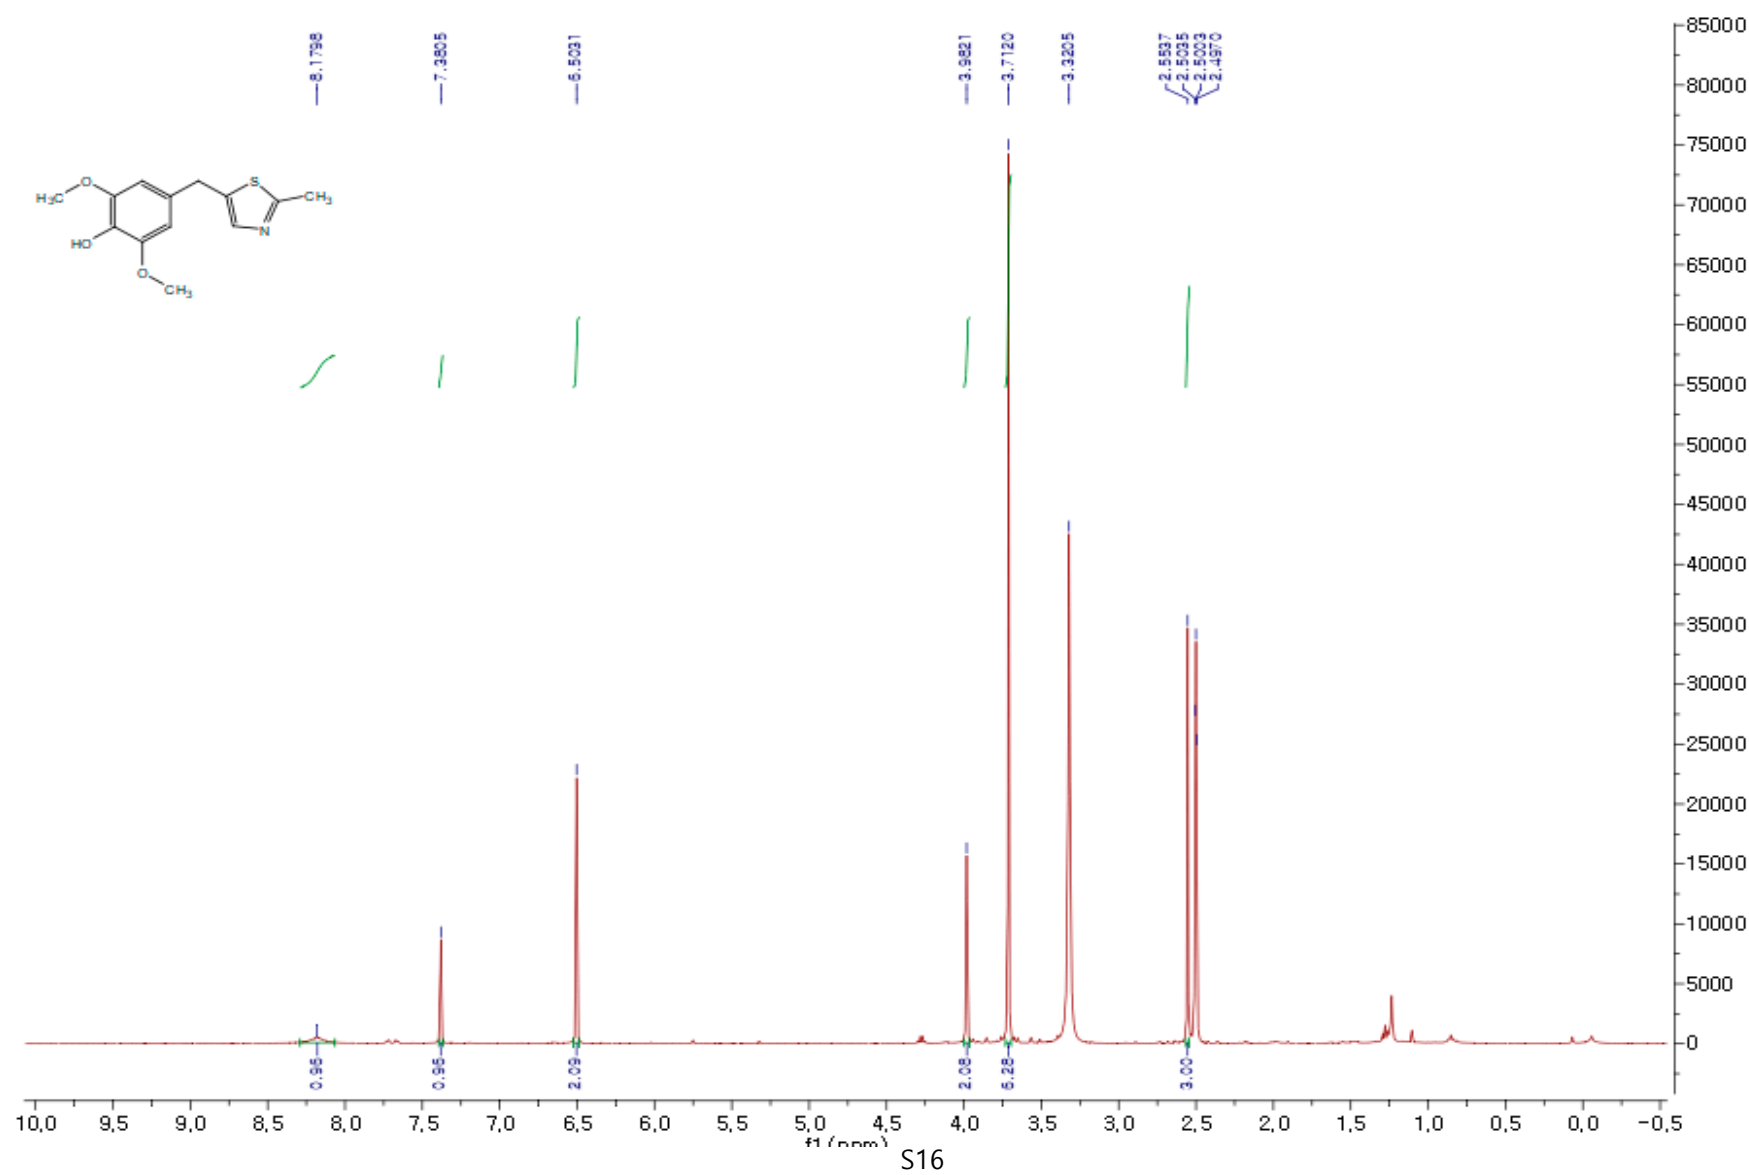

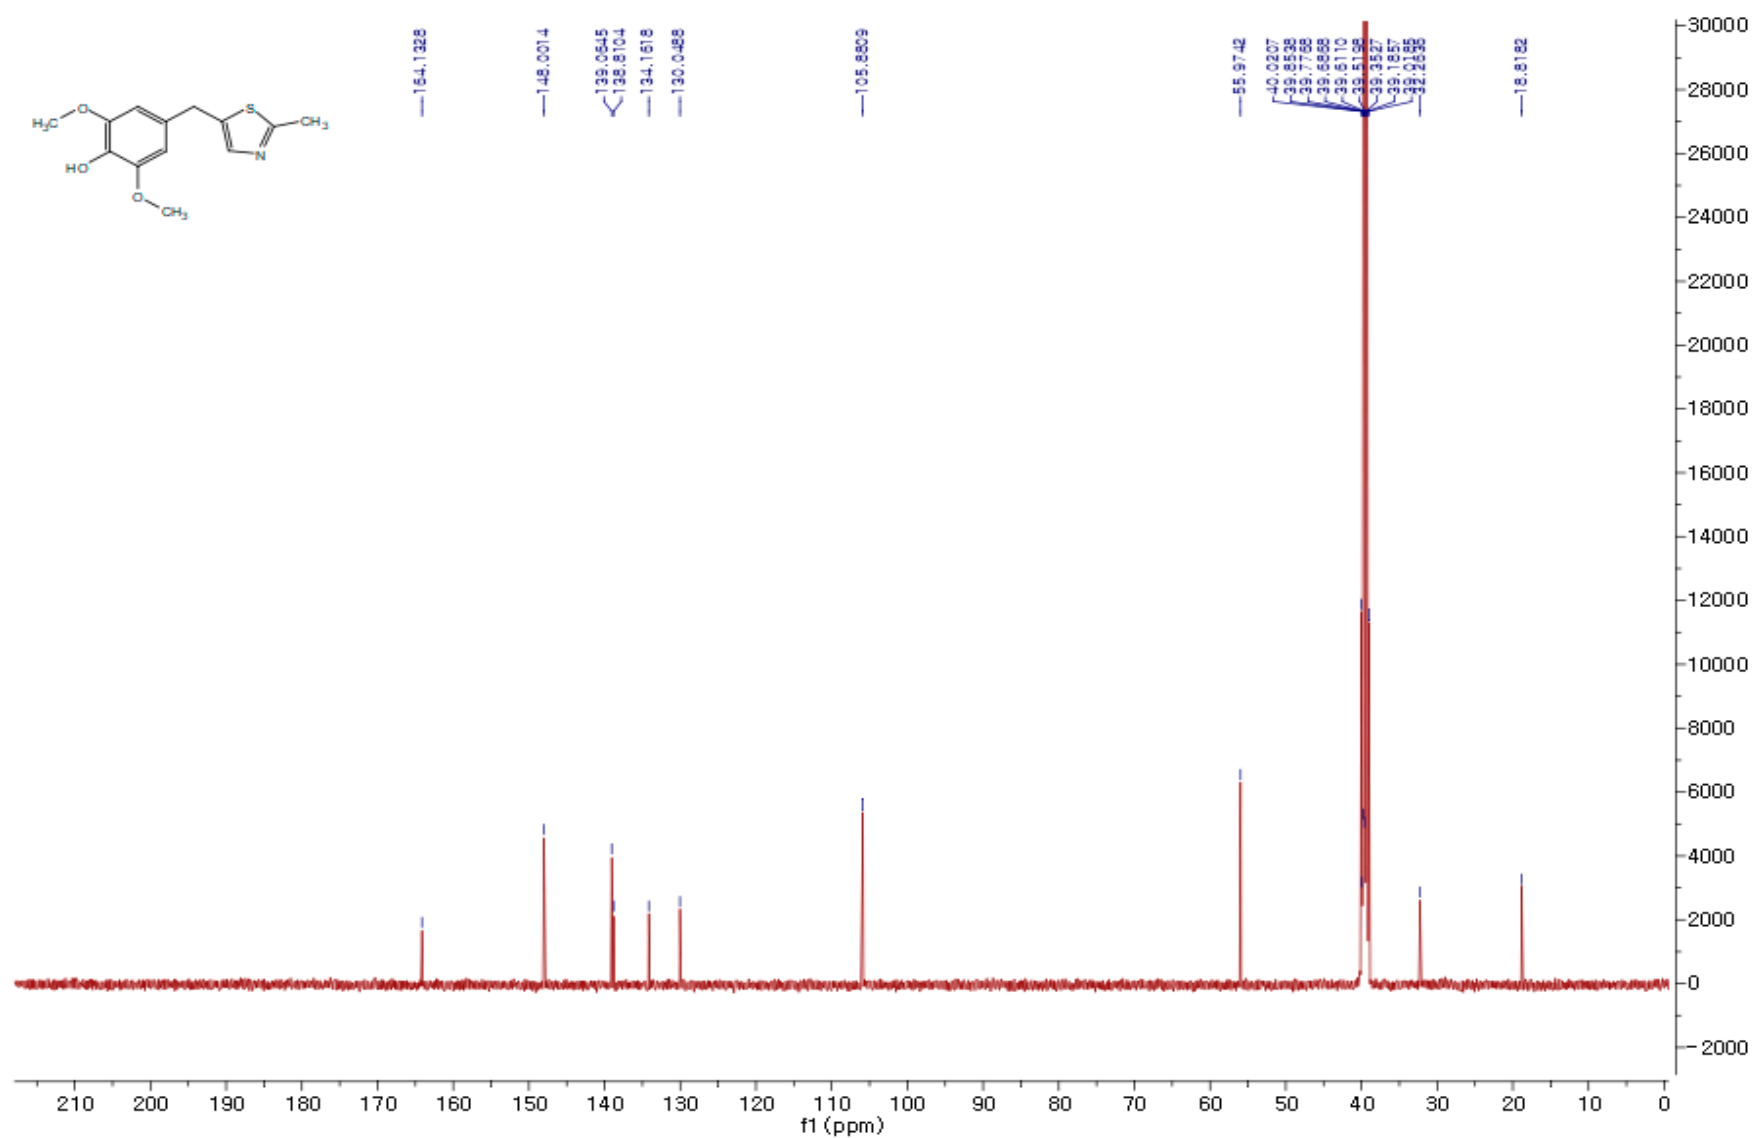

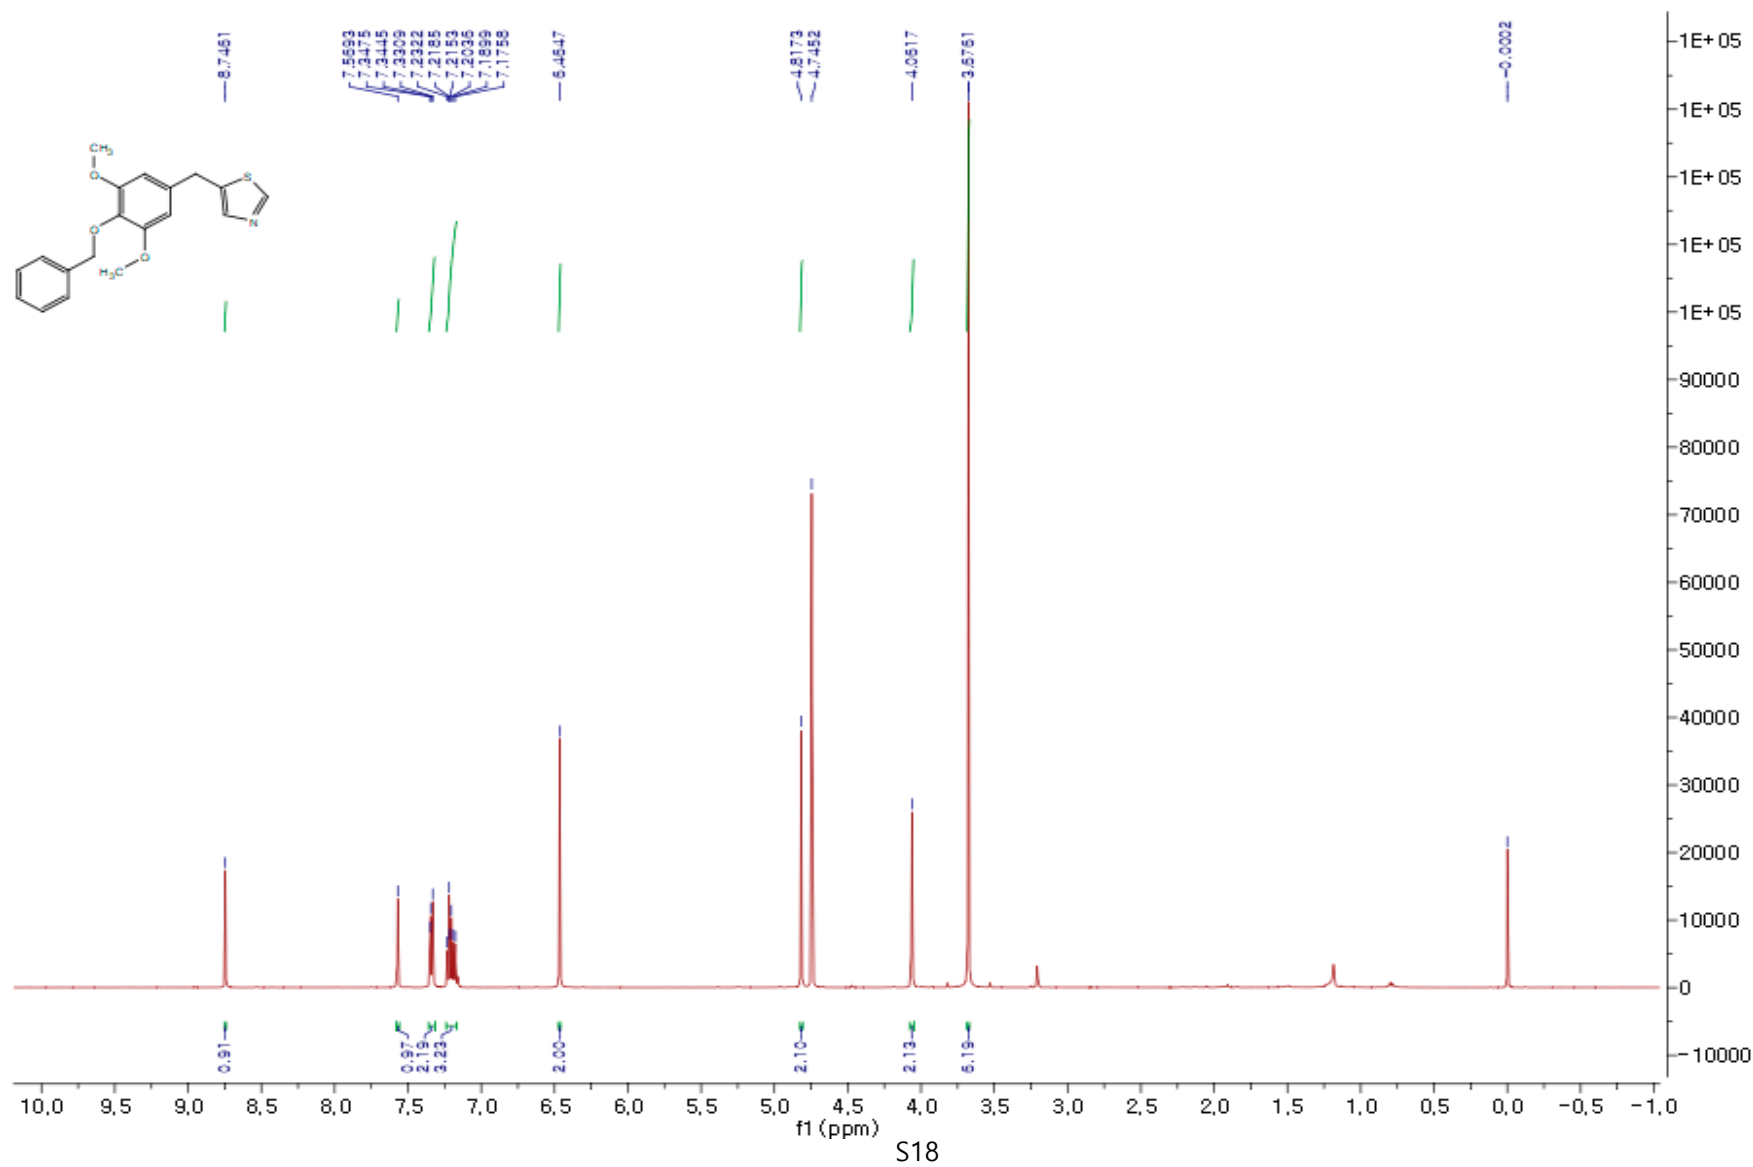

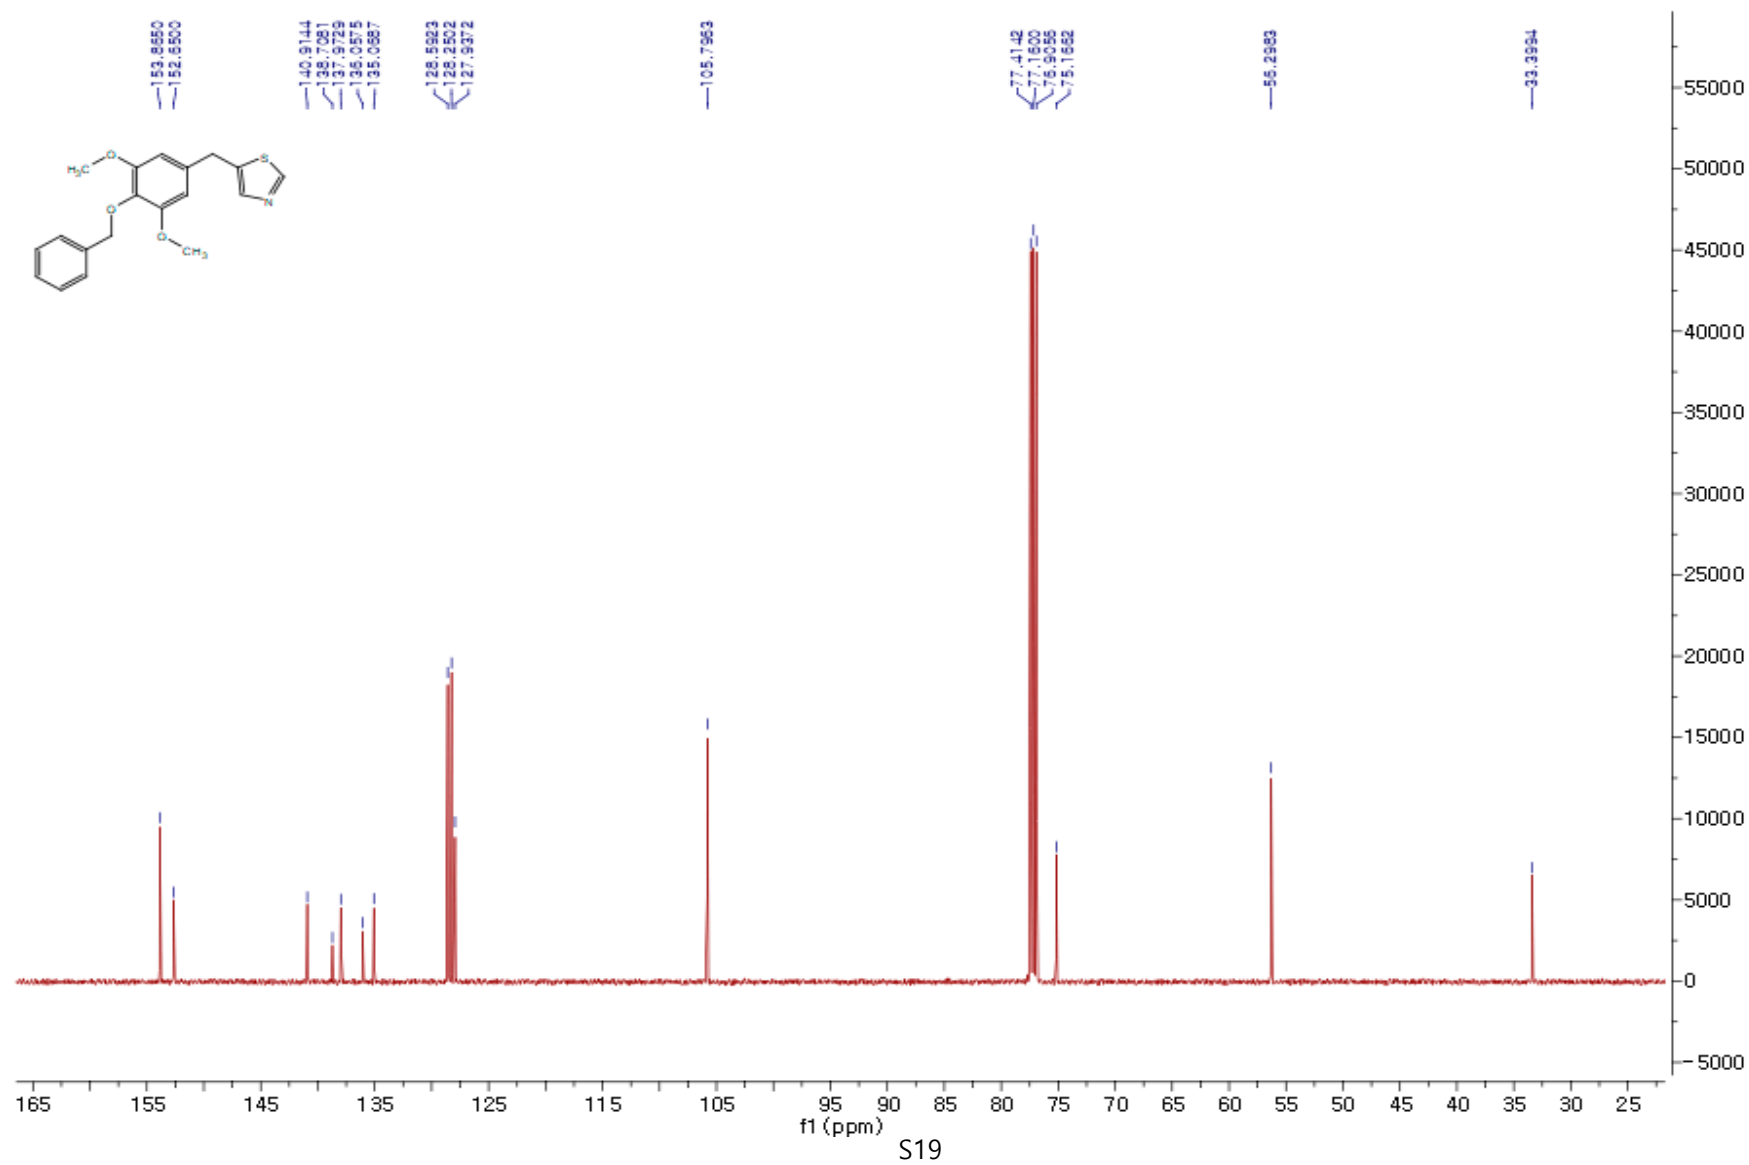

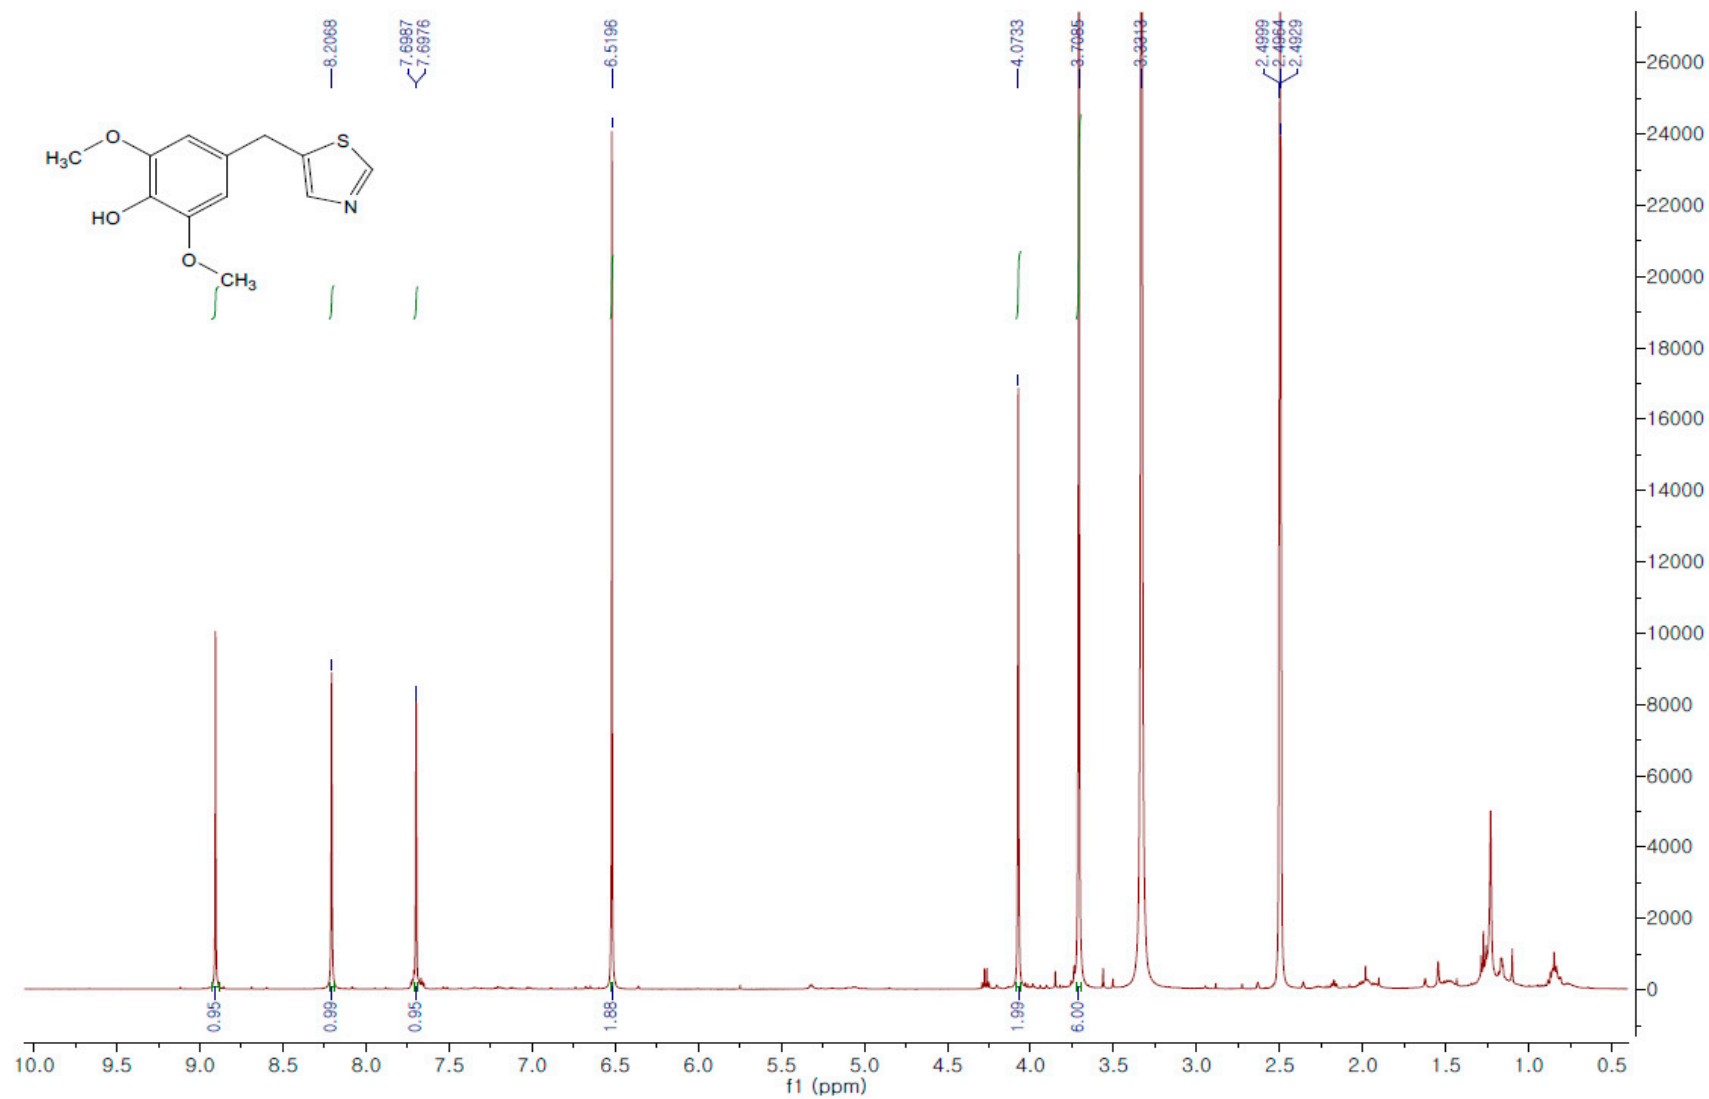

S20

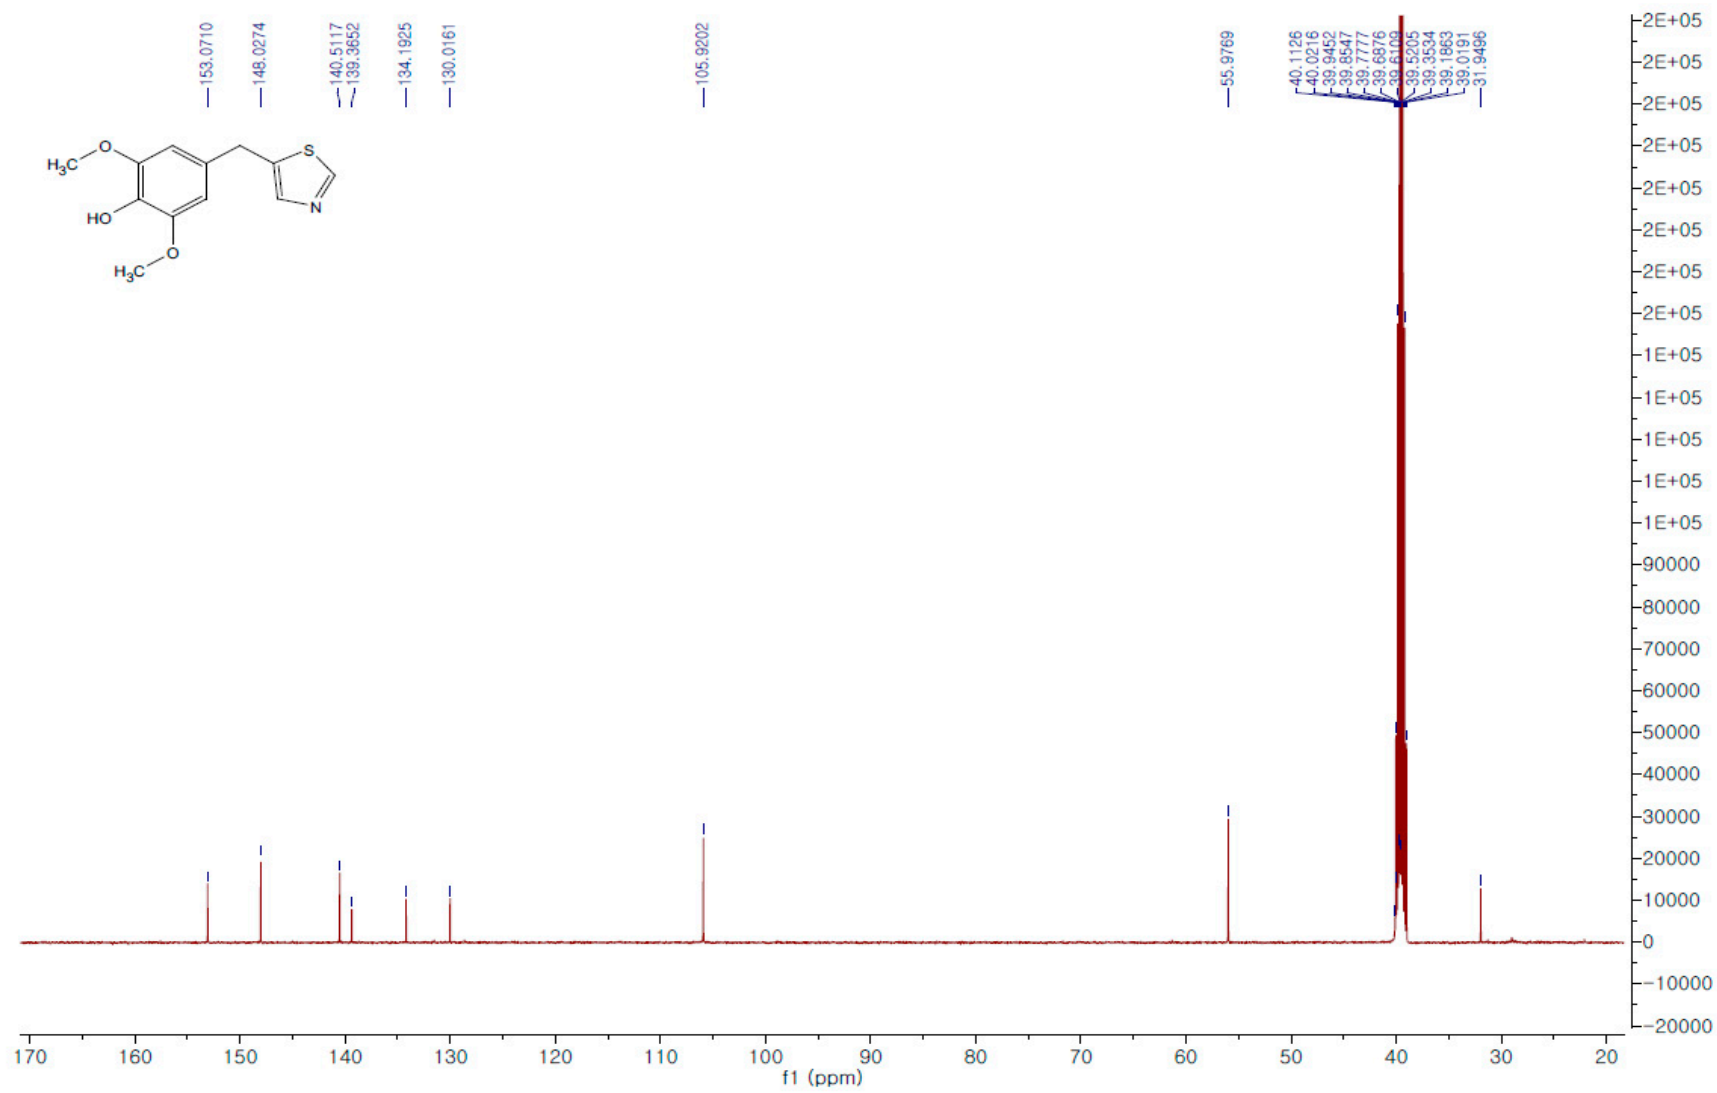

S21
